# Supplementary material for: Presenilin mutations deregulate mitochondrial Ca2+ homeostasis and metabolic activity causing neurodegeneration in Caenorhabditis elegans
Source: eLife journal article supplement (doi:10.7554/elife.33052), 2018-07-10
Supplement: supp [file elife-33052-supp-v1.zip]

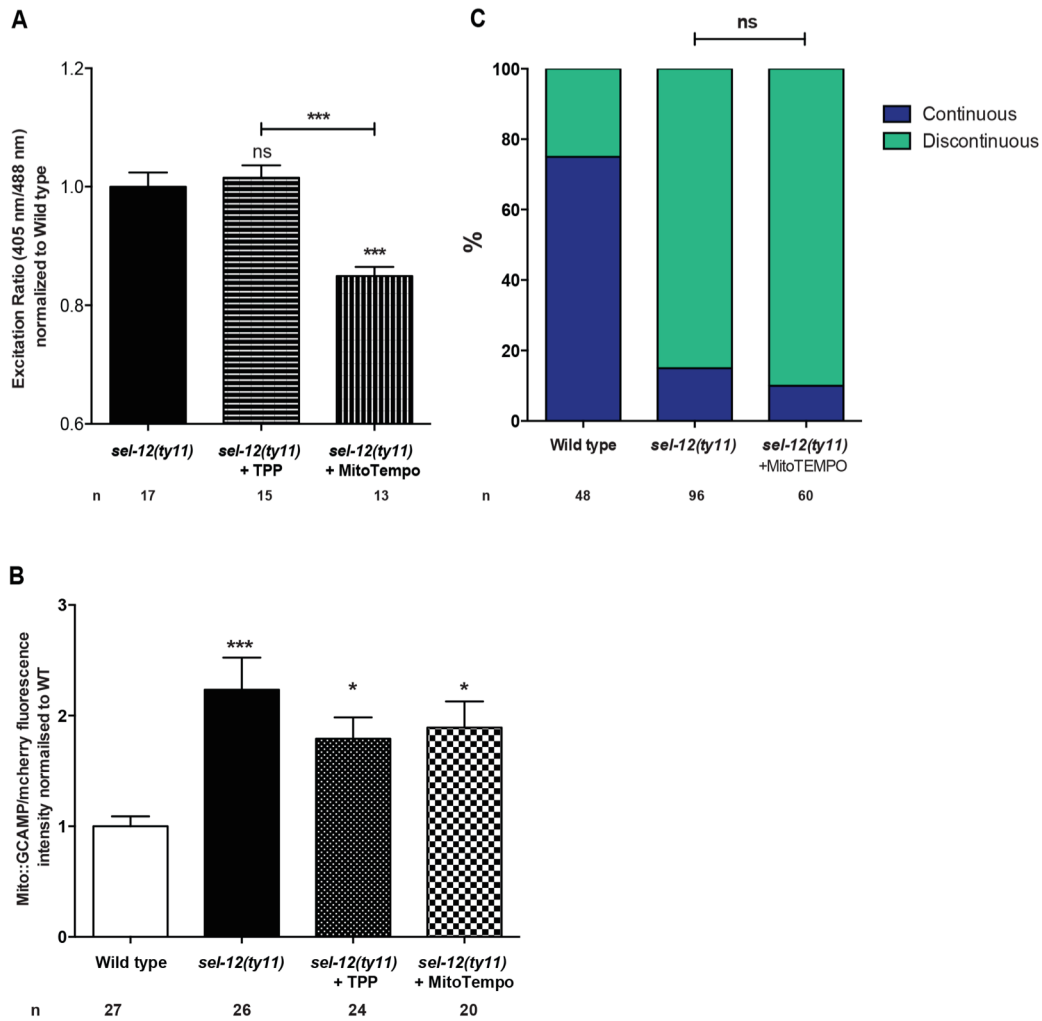

**Figure 9-figure supplement 1. Mitochondrial disorganization in the mechanosensory neurons of *sel-12* animals is not a direct result of elevated ROS levels.** (A) Quantification of oxidized state of ALM neuronal mitochondria using *zhsEx17* [*Pmec-4*mitoLS::*ROGFP*] treated with TPP or mitoTEMPO. (B) Quantification of mitochondrial  $Ca^{2+}$  using animals expressing mito::GCaMP6 and mCherry in their mechanosensory neurons (*take415*) treated with TPP or mitoTEMPO. (C) Quantification of ALM neuronal mitochondrial morphology in wild type and MitoTEMPO or vehicle treated day 1 *sel-12(ty11)* animals. Data are displayed with blue and green representing the percentage of animals displaying continuous and discontinuous mitochondrial morphology, respectively. ns  $P > 0.05$  (Chi-square test). n = number of animals analyzed per genotype. Mitochondrial analysis was done using transgenic animals expressing mito::GFP in mechanosensory neurons (*jsIs609*).
