# Supplementary material for: Presenilin mutations deregulate mitochondrial Ca2+ homeostasis and metabolic activity causing neurodegeneration in Caenorhabditis elegans
Source: eLife journal article supplement (doi:10.7554/elife.33052), 2018-07-10
Supplement: supp [file elife-33052-supp-v1.zip]

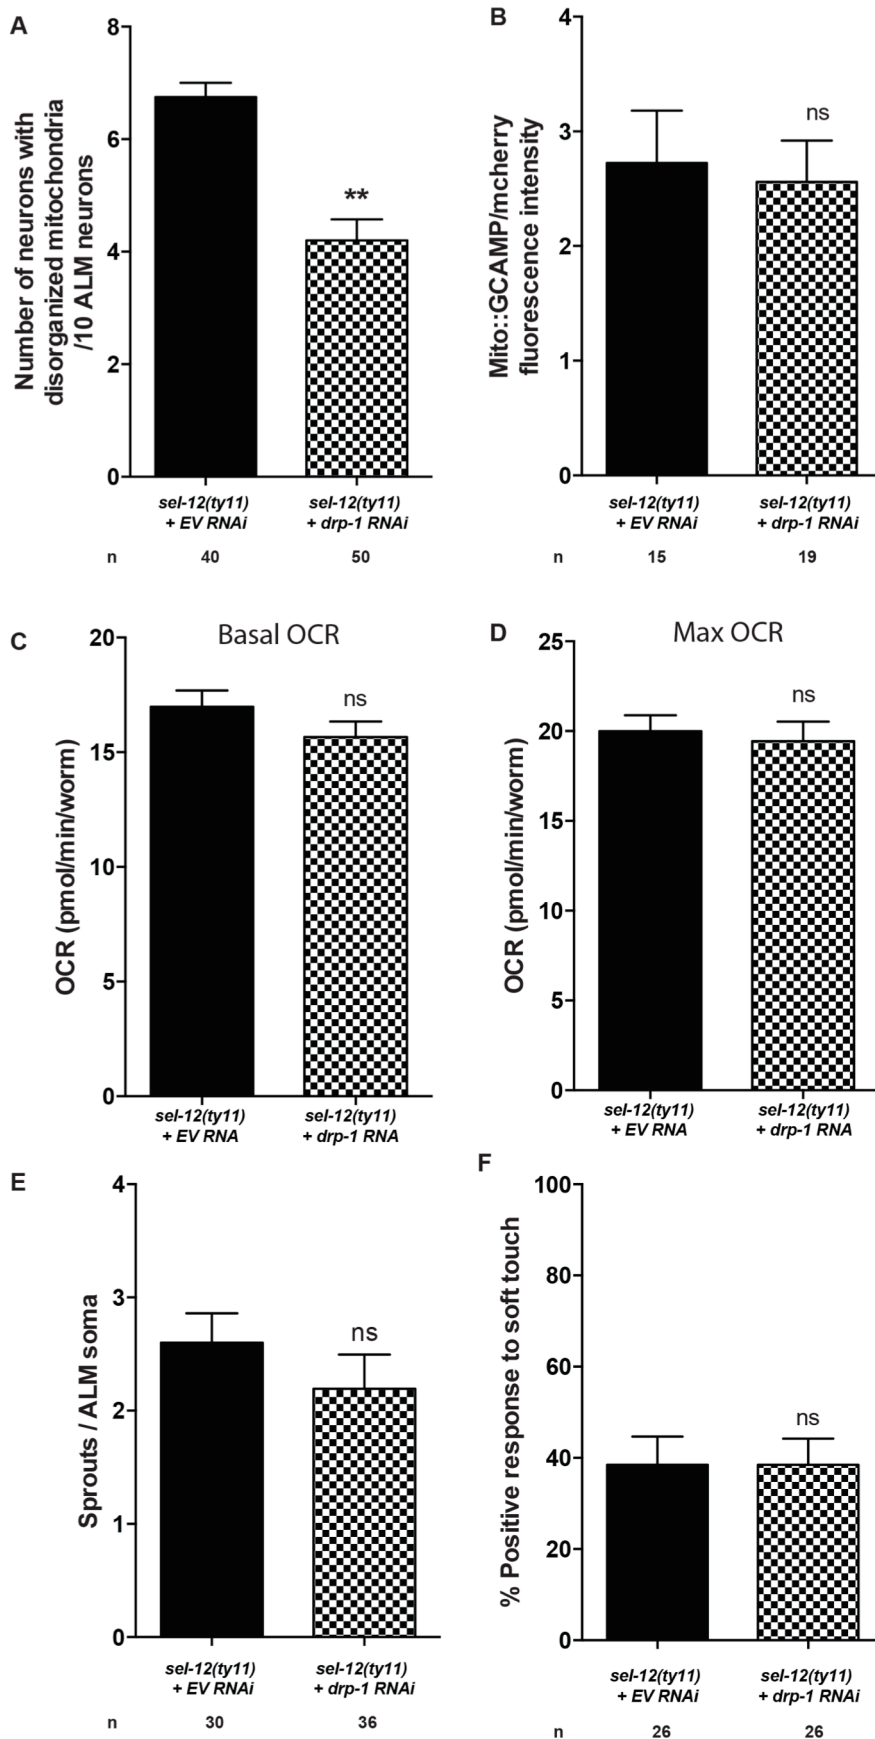

**Figure 8-figure supplement 1. Reduction of mitochondrial fission does not alleviate the neurodegeneration in *sel-12(ty11)* animals.** (A) Quantification of ALM neuronal mitochondrial morphology in *sel-12(ty11)* animals grown on EV and *drp-1* RNAi. Analysis was done using transgenic animals expressing mito::GFP in mechanosensory neurons (*jsIs609*). (B) Quantification of mitochondrial  $Ca^{2+}$  using animals expressing mito::GCaMP6 and mCherry in their mechanosensory neurons (*takEx415*). (C) Basal and (D) maximal respiration rates of *sel-12* mutant animals grown on EV and *drp-1* RNAi. (E) Quantification of aberrant structures (sprouts/branches) on ALM neuronal soma of *sel-12(ty11)* animals grown on EV and *drp-1* RNAi. (F) Response of day 1 *sel-12(ty11)* animals grown on EV and *drp-1* RNAi to light touch. n = number of animals analyzed per genotype. Data are displayed as mean  $\pm$  SEM, and all comparisons have been made to wild type animals unless otherwise indicated. ns  $P > 0.05$ , \*\* $P < 0.001$  (two-tailed T-test).
