# Supplementary material for: Presenilin mutations deregulate mitochondrial Ca2+ homeostasis and metabolic activity causing neurodegeneration in Caenorhabditis elegans
Source: eLife journal article supplement (doi:10.7554/elife.33052), 2018-07-10
Supplement: supp [file elife-33052-supp-v1.zip]

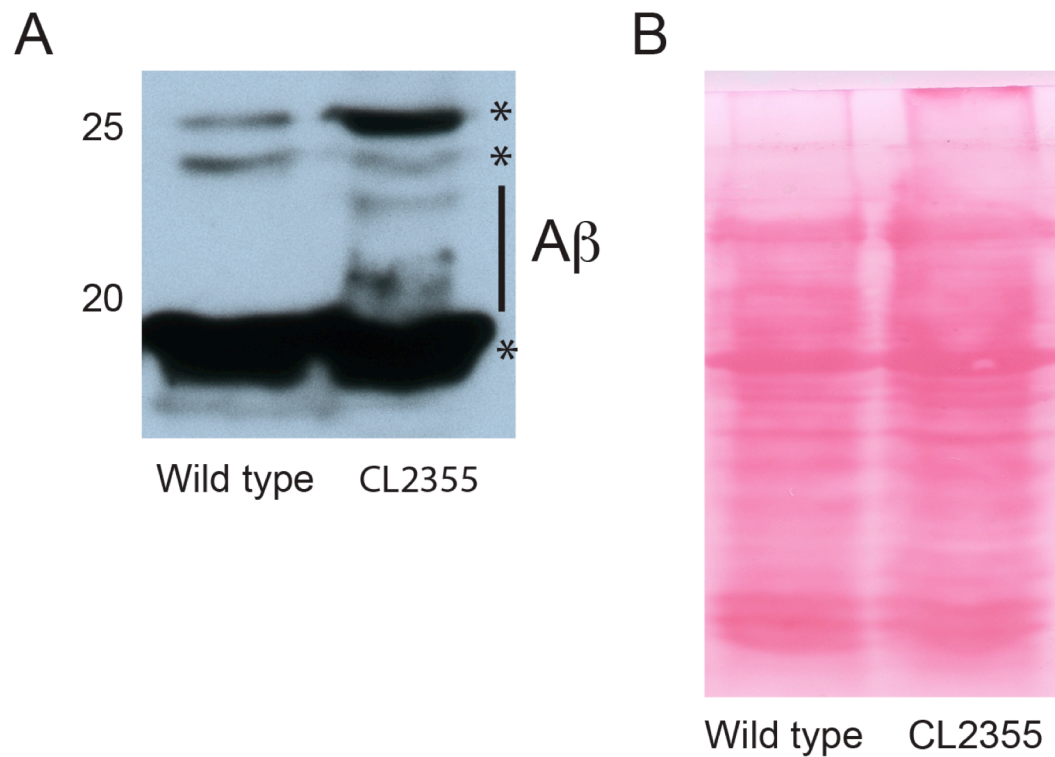

**Figure 5-figure supplement 1. Western analysis of pan-neuronal expression of Abeta1-42 in *C. elegans*.** (A) Representative western blot indicating Abeta1-42 peptide accumulation in the pan-neuronal Abeta1-42 expressing strain CL2355. \* indicate non specific bands as observed in wild type animals. (B) Ponceau C staining of western blot shown in (A) indicating equal loading.
