# Supplementary material for: Presenilin mutations deregulate mitochondrial Ca2+ homeostasis and metabolic activity causing neurodegeneration in Caenorhabditis elegans
Source: eLife journal article supplement (doi:10.7554/elife.33052), 2018-07-10
Supplement: supp [file elife-33052-supp-v1.zip]

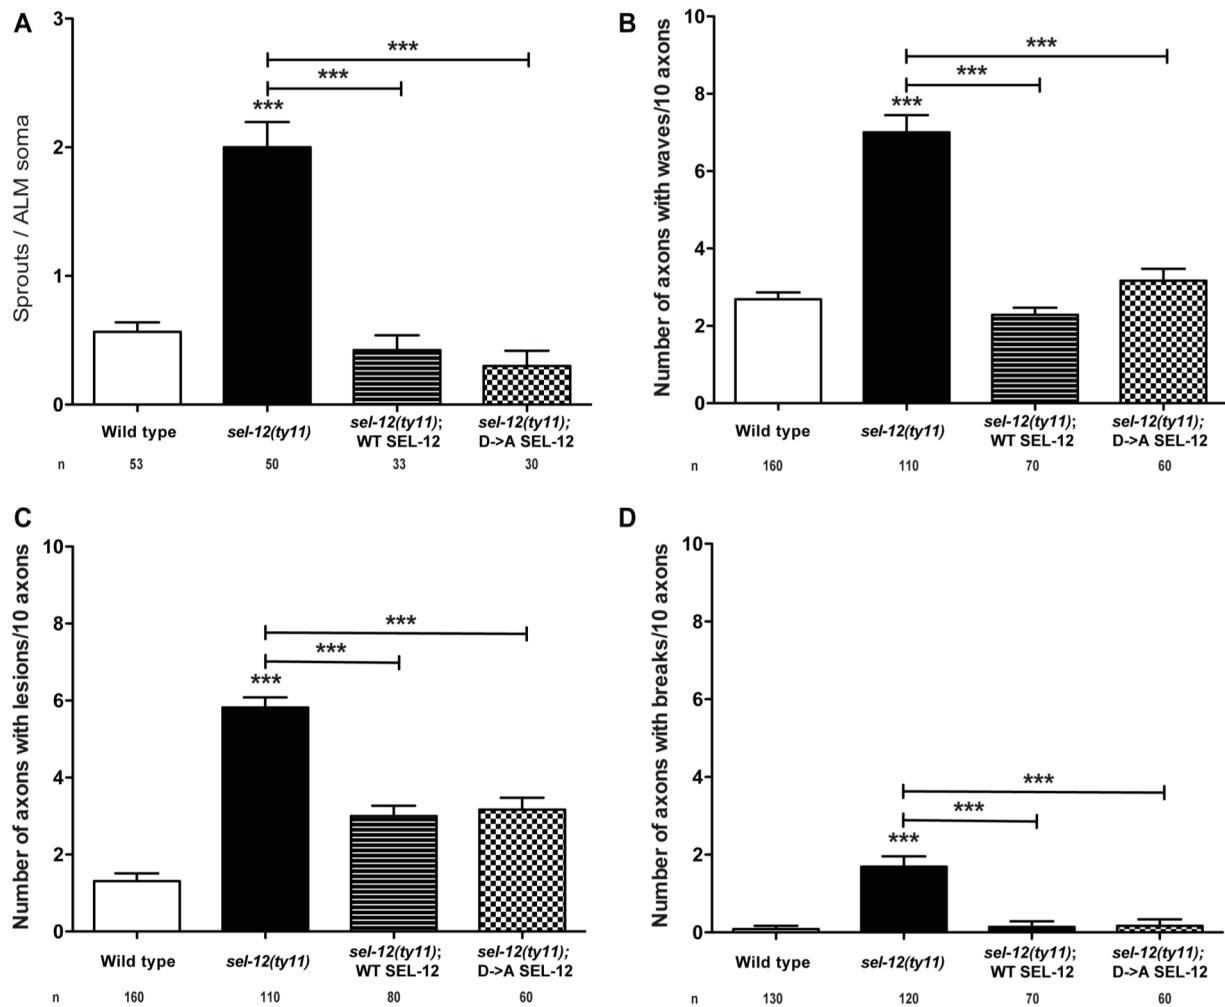

**Figure 4-figure supplement 1. Loss of gamma-secretase function does not result in neurodegenerative morphologies.** (A) Quantification of aberrant structures (sprouts/branches) on ALM neuronal soma of wild type, *sel-12(ty11)* and *sel-12(ty11)* animals expressing wild type or a protease dead SEL-12 at day 1 of adulthood. Quantification of wave-like processes (B), lesions (C) and breaks (D) in ALM and PLM neuronal processes of wild type, *sel-12(ty11)* and *sel-12(ty11)* animals expressing wild type or a protease dead SEL-12 at day 1 of adulthood. Neuronal morphology analysis is done using transgenic animals expressing *mec-4p::GFP (zdlIs5)*. n = number of animals analyzed per genotype. Data are displayed as mean  $\pm$  SEM, and all comparisons have been made to wild type animals unless otherwise indicated. \*\*\*P<0.0001 (One way ANOVA with Tukey test).
