# Supplementary material for: Presenilin mutations deregulate mitochondrial Ca2+ homeostasis and metabolic activity causing neurodegeneration in Caenorhabditis elegans
Source: eLife journal article supplement (doi:10.7554/elife.33052), 2018-07-10
Supplement: supp [file elife-33052-supp-v1.zip]

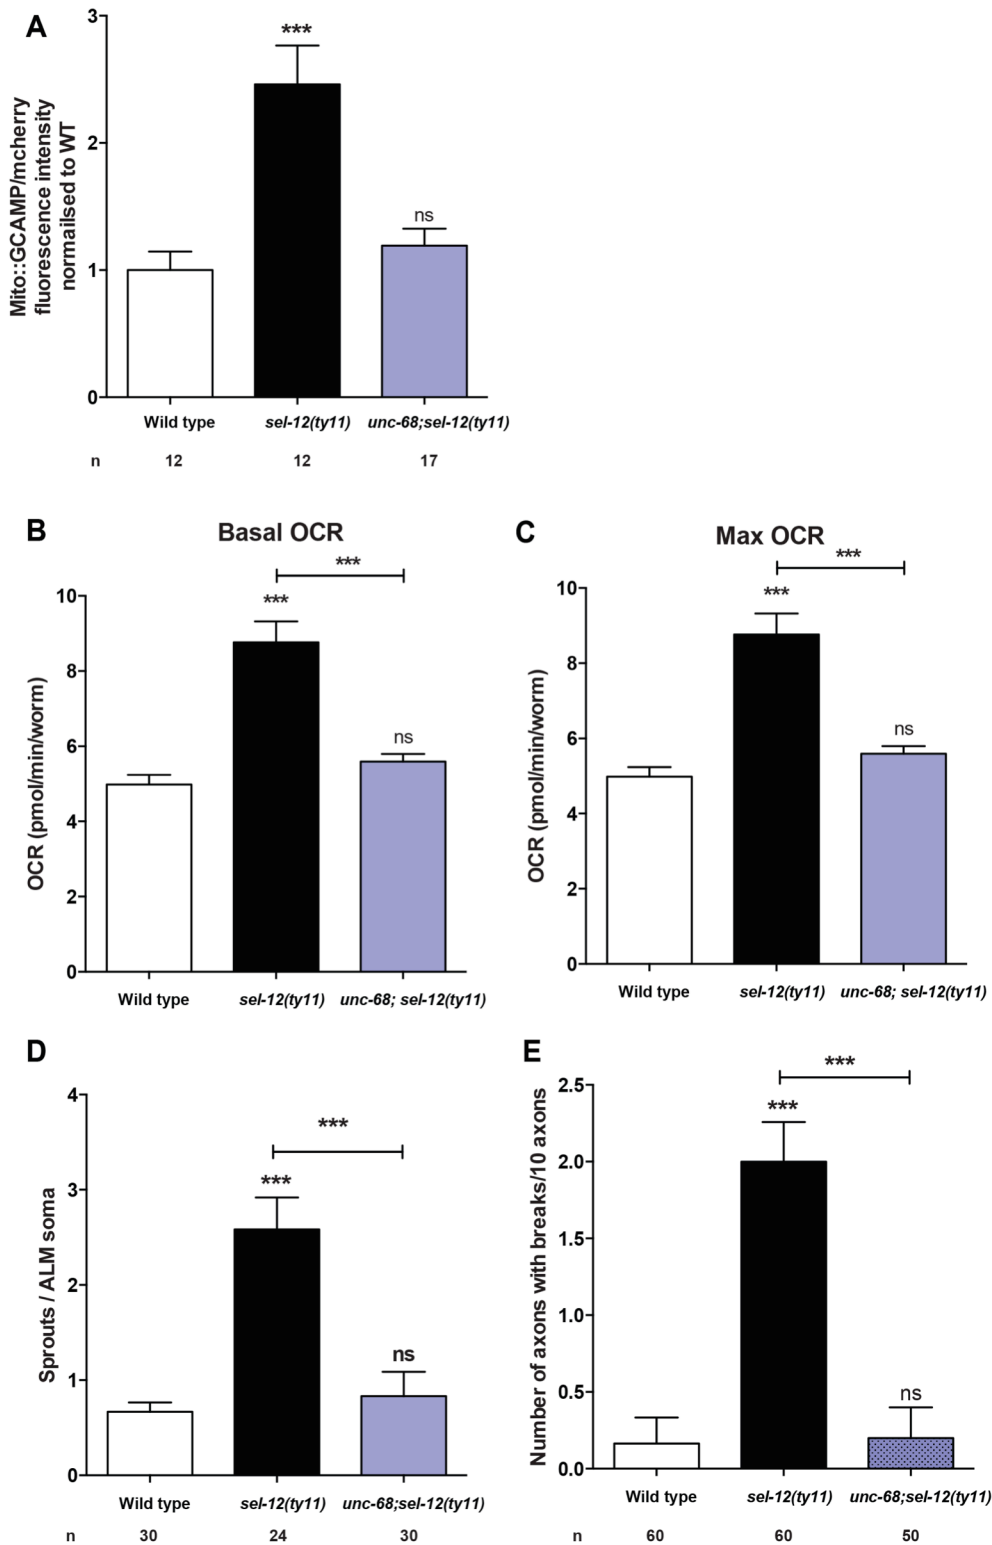

**Figure 6-figure supplement 1.**  
**Loss of ryanodine receptors results in the improvement of neurodegeneration in *sel-12* null animals.** (A) Quantification of mitochondrial  $\text{Ca}^{2+}$  using animals expressing mito::GCaMP6 and mCherry in their mechanosensory neurons (*takEx415*). (B) Basal and (C) maximal respiration rates of wild type, *sel-12*, and *unc-68; sel-12(ty11)* mutant animals at day 1 of adulthood. (D) Quantification of aberrant structures (sprouts/branches) on ALM neuronal soma and (E) frequency of breaks in ALM and PLM neuronal processes at day 1 of adulthood. n = number of animals analyzed per genotype. Data are displayed as mean  $\pm$  SEM, and all comparisons have been made to wild type animals unless otherwise indicated. ns  $P > 0.05$ , \*\*\* $P < 0.0001$  (One way ANOVA with Tukey test).
