# Supplementary material for: Presenilin mutations deregulate mitochondrial Ca2+ homeostasis and metabolic activity causing neurodegeneration in Caenorhabditis elegans
Source: eLife journal article supplement (doi:10.7554/elife.33052), 2018-07-10
Supplement: supp [file elife-33052-supp-v1.zip]

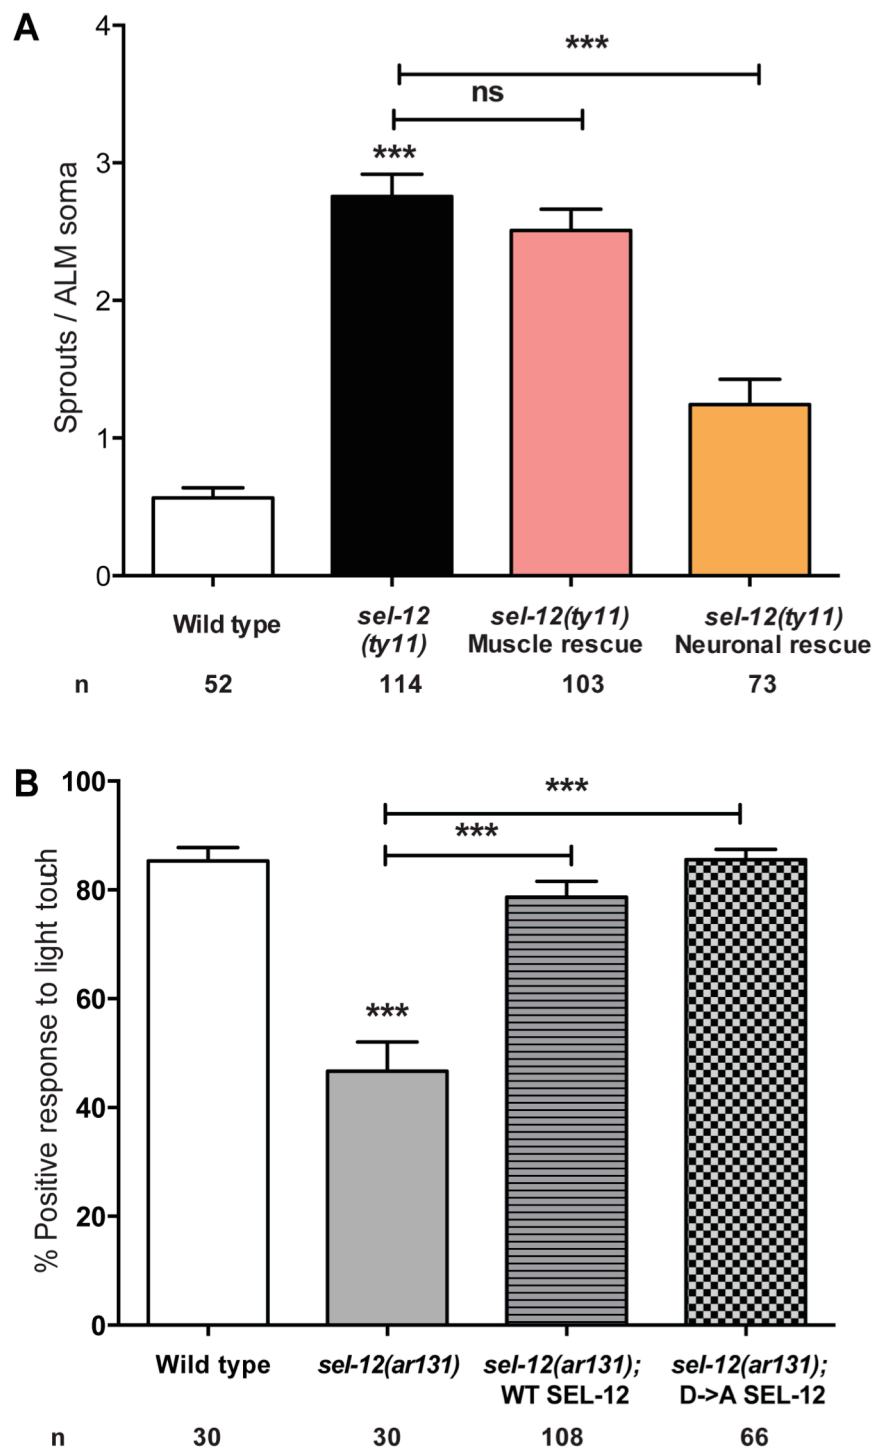

**Figure 3-figure supplement 1. SEL-12 has a tissue-specific but protease independent role in neuronal health maintenance.** (A) Quantification of aberrant structures (sprouts/branches) in ALM neurons of day 1 *sel-12(ty11)* animals with tissue specific SEL-12 expression. ALM neuronal morphology analysis is done using transgenic animals expressing *mec-4p::GFP (zdIs5)*. (B) Quantification of the response of wild type, *sel-12(ar131)* and *sel-12(ar131)* animals expressing wild type or a protease dead SEL-12 to anterior and posterior light touches. n = number of animals analyzed per genotype. Data are displayed as mean  $\pm$  SEM, and all comparisons have been made to wild type animals unless otherwise indicated. ns  $P > 0.05$ , \*\*\* $P < 0.0001$  (One way ANOVA with Tukey test).
