# Supplementary material for: Presenilin mutations deregulate mitochondrial Ca2+ homeostasis and metabolic activity causing neurodegeneration in Caenorhabditis elegans
Source: eLife journal article supplement (doi:10.7554/elife.33052), 2018-07-10
Supplement: supp [file elife-33052-supp-v1.zip]

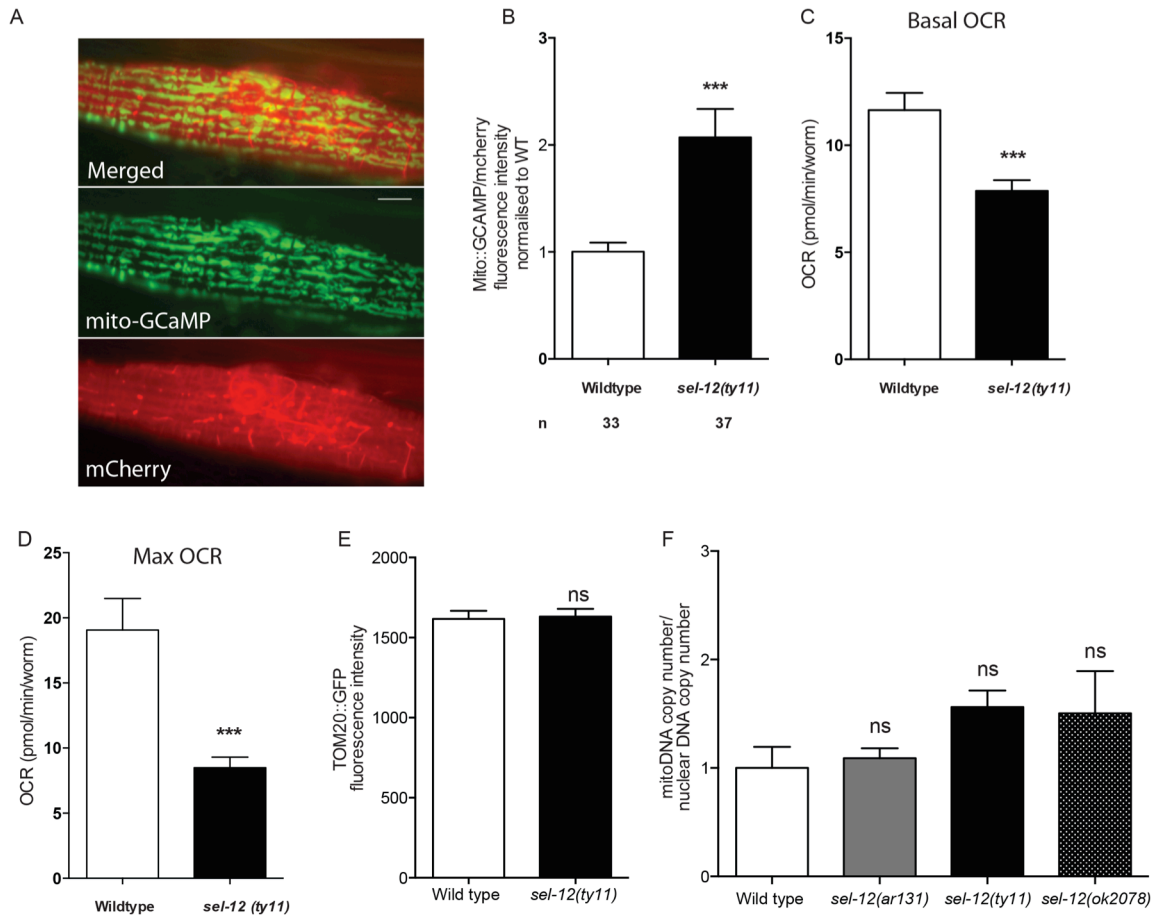

**Figure 1-figure supplement 1. Mitochondrial  $\text{Ca}^{2+}$  levels are higher in *sel-12* mutants.** (A) Representative image of mito-GCaMP6 and mCherry expression (*takEx347*). Scale bar represents 10  $\mu\text{m}$ . (B) Quantification of mitochondrial  $\text{Ca}^{2+}$  using animals expressing mito::GCaMP6 and mCherry in their mechanosensory neurons (*takEx415*). (C) Basal and (D) maximal respiration rates of wild type and *sel-12* mutant animals at day 8 of adulthood. (E) Mitochondrial fluorescence intensity measured in wild type and *sel-12(ty11)* animals expressing TOM20::GFP (*zclIs14*) (F) . Quantification of mitochondrial DNA copy number normalized to nuclear DNA copy number in wild type and *sel-12(ar131)*, *sel-12(ty11)* and *sel-12(ok2078)* animals. n = number of animals analyzed per genotype. Data are displayed as mean  $\pm$  SEM, and all comparisons have been made to wild type animals. ns  $P > 0.05$ , \*\*\* $P < 0.0001$  (Two-tailed T-test for B-E, one way ANOVA with Tukey test for F).
