# Supplementary material for: Presenilin mutations deregulate mitochondrial Ca2+ homeostasis and metabolic activity causing neurodegeneration in Caenorhabditis elegans
Source: eLife journal article supplement (doi:10.7554/elife.33052), 2018-07-10
Supplement: supp [file elife-33052-supp-v1.zip]

Archive with 28 entries (28 files):
- elife_poa_e33052_Figure_4_figure_supplement_1_source_data_1.xlsx
- elife_poa_e33052_Figure_8_figure_supplement_1.pdf
- elife_poa_e33052_Figure_5_figure_supplement_1_source_data_1.pdf
- elife_poa_e33052_Figure_6_figure_supplement_2.pdf
- elife_poa_e33052_Figure_6_figure_supplement_1_source_data_1.xlsx
- elife_poa_e33052_Figure_9_figure_supplement_1_source_data_1.xlsx
- elife_poa_e33052_Transparent_Reporting_File.docx
- elife_poa_e33052_Figure_4_source_data_1.xlsx
- elife_poa_e33052_Figure_3_figure_supplement_1_source_data_1.xlsx
- elife_poa_e33052_Figure_7_figure_supplement_1.pdf
- elife_poa_e33052_Figure_9_source_data_1.xlsx
- elife_poa_e33052_Figure_1_figure_supplement_1_source_data_1.xlsx
- elife_poa_e33052_Figure_5_figure_supplement_1.pdf
- elife_poa_e33052_Figure_6_figure_supplement_1.pdf
- elife_poa_e33052_Figure_9_figure_supplement_1.pdf
- elife_poa_e33052_Figure_8_figure_supplement_1_source_data_1.xlsx
- elife_poa_e33052_Figure_8_source_data_1.xlsx
- elife_poa_e33052_Figure_7_source_data_1.xlsx
- elife_poa_e33052_Figure_1_source_data_1.xlsx
- elife_poa_e33052_Figure_5_source_data_1.xlsx
- elife_poa_e33052_Figure_3_source_data_1.xlsx
- elife_poa_e33052_Figure_2_source_data_1.xlsx
- elife_poa_e33052_Figure_3_figure_supplement_1.pdf
- elife_poa_e33052_Figure_4_figure_supplement_1.pdf
- elife_poa_e33052_Figure_1_figure_supplement_1.pdf
- elife_poa_e33052_Figure_6_source_data_1.xlsx
- elife_poa_e33052_Figure_6_figure_supplement_2_source_data_1.xlsx
- elife_poa_e33052_Figure_7_figure_supplement_1_source_data_1.xlsx
