# Supplementary material for: Presenilin mutations deregulate mitochondrial Ca2+ homeostasis and metabolic activity causing neurodegeneration in Caenorhabditis elegans
Source: eLife journal article supplement (doi:10.7554/elife.33052), 2018-07-10
Supplement: supp [file elife-33052-supp-v1.zip › elife_poa_e33052_Figure_1_figure_supplement_1_source_data_1.xlsx]

## Sheet: Fig. S1B
Figure 1-figure supplement 1. Mitochondrial Ca2+ levels are higher in sel-12 mutants.
Mito::GCAMP/mcherry fluorescence intensity normailsed to WT
n	Wild type	sel-12(ty11)
1	0.952512	2.03083
2	1.77378	1.47
3	0.485151	1.74332
4	0.781531	1.15275
5	0.924756	0.986887
6	0.587488	0.779191
7	0.936993	7.41678
8	0.747528	1.3214
9	1.8986	0.770445
10	0.986578	2.6181
11	0.675156	1.54227
12	0.844627	1.74892
13	0.589354	0.767488
14	1.78905	4.12703
15	1.0269	1.56483
16	0.557343	6.06898
17	2.03899	5.79577
18	0.99126	0.749161
19	0.911974	0.67911
20	0.481592	0.886338
21	1.2729	0.656094
22	0.645701	0.727865
23	1.1009	1.56182
24	0.765452	0.765543
25	2.32904	2.51724
26	0.463139	2.67103
27	0.551775	2.17874
28	0.240326	0.752135
29	1.01314	4.30167
30	1.18705	1.1293
31	1.02355	1.98387
32	0.851958	1.57931
33	1.57391	1.34807
34		1.60775
35		2.29182
36		3.46864
37		2.85152
Average	1	2.0706

## Sheet: Fig. S1C
Figure 1-figure supplement 1. Mitochondrial Ca2+ levels are higher in sel-12 mutants.
Basal OCR
n	Wild type	sel-12(ty11)
1	14.576	9.25611
2	28.123	9.24743
3	12.7737	10.1674
4	15.2412	8.3526
5	16.0541	7.31403
6	19.8497	12.1326
7	19.0953	12.7401
8	14.9119	11.4592
9	13.4702	10.9048
10	18.4061	12.2805
11	13.5578	9.20944
12	14.892	13.1267
13	13.7718	10.8031
14	19.043	11.5992
15	18.781	14.5633
16	10.719	4.77777
17	9.74198	5.43143
18	15.7127	5.66879
19	14.4324	6.68151
20	14.2676	7.95437
21	16.3119	4.64169
22	16.9604	8.49899
23	12.977	7.11161
24	8.0989	6.62708
25	12.3883	3.65137
26	11.9224	8.82649
27	6.22768	8.77287
28	5.5398	8.16896
29	10.9443	8.07238
30	12.4581	9.00649
31	3.35347	4.1175
32	7.60037	3.19407
33	6.21942	2.52395
34	8.1427	2.71895
35	5.47403	1.6726
36	8.78737	8.44067
37	9.15715	5.93752
38	5.94298	6.24496
39	6.63472	6.27909
40	6.15843	6.99515
41	3.61696	7.32811
42	5.00979	17.1058
43	6.78354	4.40191
44	5.38214	4.3731
45	4.41263	5.76104
Average	11.6428	7.86983

## Sheet: Fig. S1D
Figure 1-figure supplement 1. Mitochondrial Ca2+ levels are higher in sel-12 mutants.
Maximal OCR
n	Wild type	sel-12(ty11)
1	24.7742	13.8068
2	24.8313	9.81653
3	20.7853	8.32985
4	20.6422	5.66967
5	23.4972	6.46073
6	35.0162	25.2711
7	37.5726	11.9412
8	33.8167	9.64696
9	28.7663	8.44987
10	29.2654	11.2798
11	58.6239	14.6483
12	32.368	10.4554
13	26.8105	8.79795
14	23.5459	5.07089
15	26.2105	5.92397
16	3.14242	3.96284
17	7.1543	3.87117
18	6.65615	4.19331
19	4.49661	2.85313
20	12.6808	4.14424
21	25.2861	12.3589
22	3.07201	9.57558
23	5.63367	5.75992
24	9.10175	3.83685
25	7.62508	9.32621
26	8.135	10.6222
27	6.72356	6.81373
28	7.94136	5.83565
29	10.0542	6.32554
30	7.94835	9.59842
Average	19.0726	8.48822

## Sheet: Fig. S1E
Figure 1-figure supplement 1. Mitochondrial Ca2+ levels are higher in sel-12 mutants.
	mitoDNA copy number/ nuclear DNA copy number normalized to Wild type
	Wild type	sel-12(ar131)	sel-12(ty11)	sel-12(ok2078)
	0.640106	0.857121	1.20713	0.773991
	1.23392	1.04584	1.44865	0.935555
	0.703749	1.27612	1.67597	2.37758
	1.42223	1.18248	1.91577	1.93233
Average	1	1.09039	1.56188	1.50486

## Sheet: Fig. S1F
Figure 1-figure supplement 1. Mitochondrial Ca2+ levels are higher in sel-12 mutants.
	TOM20::GFP fluorescence intensity
n	Wild type	sel-12(ty11)
1	1534.55	1731.69
2	1858.15	1379.78
3	1329.64	1592.9
4	1589.17	2127.7
5	1779.85	1690.35
6	2300.9	1821.92
7	1474.53	1468.33
8	1749.49	1589.66
9	1448.06	1802.41
10	1934.95	1562.57
11	1242.14	1611.36
12	1321.51	1344.14
13	1486.39	1429.8
14	1699.36	1755.81
15	1748.19	1959.53
16	1332.94	1506.15
17	1720.61	1209.94
18	1739.28	1175.01
19	1590.04	1519.59
20	1680.38	1583.91
21	1859.43	1730.93
22	1701.63	1767.3
23	1471.38	1985.91
24	1203.92	1811.05
Average	1616.52	1631.57
