# Supplementary material for: Presenilin mutations deregulate mitochondrial Ca2+ homeostasis and metabolic activity causing neurodegeneration in Caenorhabditis elegans
Source: eLife journal article supplement (doi:10.7554/elife.33052), 2018-07-10
Supplement: supp [file elife-33052-supp-v1.zip › elife_poa_e33052_Figure_1_source_data_1.xlsx]

## Sheet: Fig. 1A
Figure 1. Mutations in sel-12 and PSEN1 result in higher rates of oxygen consumption and generate higher levels of ATP.
	Mito::GCAMP/mcherry fluorescence intensity normailsed to WT
n	Wild type	sel-12(ar131)	sel-12(ty11)
1	1.28822	1.91445	3.29942
2	1.16278	2.59855	4.24245
3	1.27628	2.31194	2.59855
4	1.79319	3.25372	2.3502
5	0.923438	1.35801	4.93825
6	0.414255	2.86665	5.32754
7	0.826758	2.76632	4.45587
8	1.36084	1.87805	5.1331
9	1.15004	2.83792	2.30245
10	0.805523	2.53987	3.43056
11	0.806161	3.21034	2.07846
12	0.783493	1.53328	4.14204
13	1.06988	3.65905	3.74906
14	0.639614	1.59109	3.63208
15	0.955185	1.77832	2.63773
16	0.71044	1.76137	1.77506
17	0.762845	2.97808	3.63994
18	0.429017	2.18686	2.94683
19	0.918256	1.81147	3.51884
20	1.06881	3.10972	2.96112
21	1.1574	1.88754	2.80431
22	0.94087	2.11338	2.04052
23	1.12104	1.75518	3.20886
24	0.986037	2.65328	3.25502
25	2.16223	1.8006
26	0.875991	1.86947
27	0.909637	2.99175
28	0.699749	2.98653
29	0.57794	3.76944
30	1.42407	1.76501
31	1.51188
32	0.526842
33	0.94762
34	0.999562
35	1.65431
36	0.47301
37	0.516042
38	1.11632
39	0.990821
40	1.96719
41	0.378633
42	0.86544
43	0.889037
44	1.16329
45	1
Average	1	2.38458	3.35284

## Sheet: Fig. 1B
Figure 1. Mutations in sel-12 and PSEN1 result in higher rates of oxygen consumption and generate higher levels of ATP.
	ATP levels normalized to WT
	Wild type	sel-12(ar131)	sel-12(ty11)	sel-12(ok2078)
	0.998654	1.80183	2.59914	1.02221
	1.00035	1.76828	2.53985	1.08634
	0.998774	1.56995	2.54504	1.0124
	0.998554	1.72505	2.20181	1.40398
	1.00083	1.65494	1.99066	1.41821
	0.999521	1.63229	2.10066	1.45507
	0.999651	1.48974	1.90161	1.32948
	1.00232	4.53724	4.91131	4.37712
	1.00007	3.98361	4.56527	3.99897
	1.00033	4.02028	4.23282	3.93649
	0.999854	13.1374	7.74626	12.9338
	1.00018	11.7361	6.99238	11.7485
	0.999424	11.3836	6.94155	11.8137
Average	0.999885	4.64925	3.94372	4.42587

## Sheet: Fig. 1C
Figure 1. Mutations in sel-12 and PSEN1 result in higher rates of oxygen consumption and generate higher levels of ATP.
	Day 1 Basal OCR (pmol/min/worms)
	Wild type	sel-12(ar131)	sel-12(ty11)	sel-12(ok2078)
	3.72438	6.71386	5.33775	6.74517
	4.73632	7.23559	10.6888	10.3005
	5.09071	2.64914	4.5219	5.85776
	3.30491	7.65062	6.3595	4.47158
	4.55052	6.13479	5.42749	5.37886
	6.89754	5.43586	4.8898	3.81339
	2.17935	8.6107	8.27904	4.4778
	3.58316	5.44153	6.29692	4.17015
	10.3169	5.5947	6.4886	6.44331
	4.91438	5.58529	8.94913	5.15156
	4.29113	4.8124	5.6159	5.58031
	4.53259	7.28634	3.36124	7.51961
	4.72249	6.2389	5.69933	6.08354
	3.7319	9.02122	4.70547	6.68852
	7.37313	7.92641	4.42405	5.58185
	4.97537	6.79518	7.62119	7.9771
	3.33272	7.59036	5.10396	5.61341
	3.14826	5.94769	6.0288	5.30578
	3.60775	6.12732	4.04358	7.54239
	2.9745	6.60227	8.46961	5.18027
	4.65351	4.47419	7.40216	6.28798
	3.05385	4.95325	8.33992	8.06891
	2.19561	5.44846	6.89079	10.1731
	3.10585	6.5107	9.23754	5.8739
	4.09361	5.64185	7.56098	6.97096
	7.06273	5.64588	9.39569	4.84336
	5.01352	7.08848	6.09964	4.87068
	3.49399	8.38984	8.29482	3.73702
	2.57677	3.68798	4.47798	4.26065
	7.4815	5.41369	6.38231	2.6333
	3.58536	4.15011	3.35987	6.10383
	3.37051	5.38338	5.94242	4.46519
	2.28384	6.58435	7.08154	5.7122
	1.96777	5.33814	6.09167	5.49548
	2.64574	5.70397	7.33005	4.06399
	2.4253	3.89113	7.41223	5.15208
	2.49016	4.51876	8.15136	3.78889
	4.03103	4.71905	3.11074	5.67142
	2.53234	3.33994	3.14626	3.27114
	2.35158	4.01518	7.75148	4.00067
	2.1977	4.48724	7.34005	4.224
	1.73421	6.28023	4.8714	4.56006
	3.30747	4.32503	8.03343	4.34486
	3.13045	6.22808	3.07594	5.33472
	2.61235	4.88306	7.54523	5.72059
	5.70004
	4.5581
	4.37666
	3.7535
	1.95671
	2.71854
	3.656
	2.98526
	3.25756
	2.61877
	2.76503
	4.88494
	3.43464
	3.55535
	4.26639
	7.11467
	4.78583
	5.93405
	3.75798
	4.5985
	6.91835
	6.22149
	4.80415
	4.69456
	3.70994
	5.05719
	3.62382
	4.23636
	4.80382
	6.81774
	3.70821
	2.27669
	4.5833
	2.89743
	3.28728
	4.21359
	3.9999
	3.66302
	2.47806
	2.89387
	3.20516
	3.16537
	2.84265
	3.31923
	1.84831
	2.92185
	3.9112
	4.39465
	3.17421
	4.58094
	5.49479
	2.51921
	5.09164
	2.15881
	3.17254
	3.64158
	3.17162
	3.68234
	3.72748
	4.83356
	4.95472
	3.95924
	4.42884
	3.52596
	3.82568
	4.75768
	5.51964
	5.30914
	4.12267
	4.01865
	5.11612
	4.14477
	4.90665
	6.8927
	4.65347
	4.25888
	4.14862
	4.05612
	3.9726
	3.32231
	2.64585
	1.55572
	2.881
	4.50561
	0.928146
	4.43842
	2.77974
	3.02342
	2.60022
	2.5483
Average	3.92304	5.78894	6.36972	5.54471

## Sheet: Fig. 1D
Figure 1. Mutations in sel-12 and PSEN1 result in higher rates of oxygen consumption and generate higher levels of ATP.
	Day 1 Max OCR (pmol/min/worms)
	Wild type	sel-12(ar131)	sel-12(ty11)	sel-12(ok2078)
	4.7409	6.97336	3.37418	10.4155
	5.14389	13.6201	9.37564	10.9083
	10.3356	14.7642	6.52029	13.3282
	7.65458	15.2012	12.4026	14.7245
	3.27736	15.513	9.23551	10.2093
	14.9049	13.5035	10.6088	12.0471
	6.41675	11.7793	9.64628	5.17299
	9.82305	18.0365	11.6745	8.25507
	12.9528	6.14198	6.38962	10.9904
	10.0079	9.45938	12.778	13.1808
	7.01609	8.63392	14.3277	11.8272
	15.7811	15.2009	10.6345	16.739
	5.59889	10.1143	13.1685	9.23946
	8.44402	12.7058	13.0392	16.1205
	11.2052	24.6377	12.7805	12.7314
	11.7387	9.31221	8.60635	8.72633
	10.263	11.7432	7.42282	9.61624
	5.75554	13.1522	11.1662	8.83031
	7.36954	14.381	8.55463	16.3596
	5.03889	8.76071	14.5914	18.5057
	3.10864	10.9911	12.3166	8.21285
	6.10561	14.4531	14.1697	12.6137
	5.72282	9.9329	13.4695	8.00243
	14.0202	7.83738	13.4601	10.725
	10.2218	17.0553	15.7547	10.5295
	11.9295	9.51997	8.34615	6.05507
	8.32677	16.2907	11.1822	7.13576
	11.1371	15.4778	13.405	6.07286
	10.4573	17.2218	10.7754	7.98537
	5.00465	10.9623	12.7289	9.16137
	5.79245	6.88594	4.44909	4.87291
	5.62724	6.12392	9.10141	6.15373
	4.59239	7.17588	5.88504	9.41092
	11.8864	6.72653	5.18074	6.63288
	4.20587	14.0277	12.0233	7.45845
	4.59929	7.62775	9.35527	8.83791
	7.36585	13.0212	6.98962	7.10748
	6.45538	14.6573	12.1629	8.30774
	4.44391	6.9159	10.7146	8.51055
	6.90054	8.12872	9.11347	10.6527
	6.0192	10.8949	12.0175	8.6182
	7.43886	9.06012	9.44133	13.0165
	5.74802	10.3813	9.4223	8.30367
	9.97861	9.7831	9.77406	7.53774
	5.61956	10.8293	7.60726	10.0331
	3.26057
	4.64112
	7.38627
	4.11725
	5.39809
	6.478
	4.65514
	7.15592
	10.7259
	5.35665
	6.03433
	8.57962
	7.61527
	8.8123
	16.8651
	7.5083
	7.2507
	11.3229
	14.8113
	14.4434
	6.15958
	10.3569
	5.22804
	18.4878
	15.3356
	2.62449
	9.66943
	9.78574
	13.2154
	12.0064
	6.29927
	5.00197
	5.84653
	5.5426
	5.43691
	5.90639
	6.87211
	4.81838
	3.43259
	8.1278
	8.09887
	5.98439
	9.56028
	4.39514
	3.99457
	5.06515
	5.07684
	4.2538
	5.67994
	7.72853
	9.70444
	5.31761
	5.99167
	4.49962
	5.86284
	7.44256
	8.3725
	8.79672
	6.2586
	5.98591
	6.79151
	2.96293
	7.22479
	7.17568
	11.5077
	5.08349
	7.25017
	8.2259
	10.4058
	5.70145
	6.10592
	4.75826
	8.58081
	7.4664
	6.12049
	3.4688
	2.42965
	2.95523
	3.5526
	3.2995
	6.23649
	5.28897
	4.42629
	6.97061
	2.30927
	5.32427
	5.37159
	3.47435
	3.86992
	3.74526
Average	7.2215	11.6804	10.3365	9.99725

## Sheet: Fig. 1E
Figure 1. Mutations in sel-12 and PSEN1 result in higher rates of oxygen consumption and generate higher levels of ATP.
	ATP levels normalized to control
	Control	FAD
	0.709051	1.34459
	0.71803	1.9198
	0.710454	1.92345
	1.30559	2.46106
	1.13667	1.98882
	0.879931	2.3954
	0.674258	2.11144
	0.639184	2.25342
	0.552201	2.40746
	1.40435	1.6524
	1.6827	1.51855
	1.58758	1.62911
Average	1	1.96712

## Sheet: Fig. 1F
Figure 1. Mutations in sel-12 and PSEN1 result in higher rates of oxygen consumption and generate higher levels of ATP.
	Basal OCR normalized to control
	Control	FAD
	1.14348	2.02907
	1.0954	2.07842
	1.17923	2.09513
	1.10658	1.03011
	1.27399	1.32289
	1.29038	1.36948
	0.829564	2.42543
	0.870068	2.23639
	0.880644	2.28948
	0.621549	1.05832
	0.568227	1.05738
	0.590646	0.908837
	0.733864	1.02059
	0.670061	1.01306
	0.673819	1.09719
	0.948502	1.28984
	1.06415	1.17531
	1.06116	1.34747
	0.485601	0.393686
	0.358753	0.410088
	0.403782	0.448072
	2.06585	2.05469
	2.11888	2.03666
	1.96583	1.94939
Average	1	1.42237

## Sheet: Fig. 1G
Figure 1. Mutations in sel-12 and PSEN1 result in higher rates of oxygen consumption and generate higher levels of ATP.
	Maximal OCR normalized to control
	Control	FAD
	1.00168	1.53755
	0.98763	1.49568
	0.9878	1.40782
	1.15386	1.02918
	1.14595	1.00728
	1.18243	1.0548
	0.817483	2.20362
	0.695746	2.29076
	0.711231	2.21244
	0.511882	0.739868
	0.473061	0.760379
	0.470651	0.752045
	1.25989	0.925021
	1.2441	0.998113
	1.26414	0.948344
	1.19297	1.46836
	1.15803	1.4406
	1.29935	1.52904
	0.554103	0.632218
	0.611054	0.622543
	0.602136	0.65545
	1.57648	1.44197
	1.50976	1.4481
	1.58859	1.488
Average	1	1.25372

## Sheet: Fig. 1H
Figure 1. Mutations in sel-12 and PSEN1 result in higher rates of oxygen consumption and generate higher levels of ATP.
	ROS levels normalized to control
	Control	FAD
	0.91485	2.27413
	0.970106	2.30634
	0.940465	2.28273
	0.982549	2.22583
	1.00066	2.27798
	0.962422	2.27761
	0.953456	2.2863
	0.987306	1.2989
	1.06873	1.29122
	1.06964	1.33897
	0.819156	1.32141
	0.76207	1.33897
	1.0486	1.34318
	0.957665	1.38746
	1.03854	1.3086
	1.0314	1.81415
	0.77012	1.81488
	0.795736	1.82878
	0.777988	1.82732
	0.759508	1.8275
	0.704617	1.8297
	0.766461	1.38453
	0.776707	1.81616
	1.37959	1.20541
	1.30275	1.29781
	1.34172	1.19333
	1.39606	1.28207
	1.32141	1.30018
	1.39972
Average	1	1.67791
