# Supplementary material for: Presenilin mutations deregulate mitochondrial Ca2+ homeostasis and metabolic activity causing neurodegeneration in Caenorhabditis elegans
Source: eLife journal article supplement (doi:10.7554/elife.33052), 2018-07-10
Supplement: supp [file elife-33052-supp-v1.zip › elife_poa_e33052_Figure_2_source_data_1.xlsx]

## Sheet: Fig. 2A
Figure 2. SEL-12 is required for mitochondrial structural maintenance and mechanosensation.
	% ALM neurons with fragmented mitchondria
	Wildtype	sel-12(ar131)	sel-12(ty11)
	20	60	50
	13.3333	46.6667	60
Average	16.6667	53.3333	55
n per genotype analyzed	60	51	45

## Sheet: Fig. 2B
Figure 2. SEL-12 is required for mitochondrial structural maintenance and mechanosensation.
	% Positive response to soft touch
	Larval Stage 4 (L4)				Day 1 of Adulthood				Day 3 of Adulthood
n	Wildtype	sel-12(ar131)	sel-12(ty11)	sel-12(ok2078)	Wildtype	sel-12(ar131)	sel-12(ty11)	sel-12(ok2078)	Wildtype	sel-12(ar131)	sel-12(ty11)	sel-12(ok2078)
1	100	100	50	50	10	90	10	90	100	20	30	0
2	90	100	100	70	90	60	70	100	60	20	40	10
3	30	100	100	100	70	80	50	60	50	0	10	10
4	100	100	100	80	80	100	70	10	90	40	10	20
5	100	80	70	100	90	60	70	70	90	30	20	0
6	100	100	90	90	100	50	60	10	70	10	0	10
7	90	60	100	100	100	20	40	30	70	30	0	0
8	90	100	100	70	90	30	70	30	70	20	0	20
9	80	70	100	100	100	80	90	0	100	40	30	10
10	100	100	70	100	70	10	40	70	70	20	0	0
11	100	80	70	80	60	80	50	60	40	30	20	20
12	100	100	100	60	100	80	40	50	50	10	0	20
13	90	100	80	100	90	100	30	20	70	40	40	0
14	90	100	100	100	80	80	30	40	80	20	0	20
15	80	70	80	100	60	50	30	50	60	10	30	20
16	100	80	70	80	100	40	50	30	10	30	10	50
17	80	30	100	100	100	100	40	70	10	60	20	60
18	70	100	100	100	60	40	40	20	70	30	30	0
19	100	100	80	80	80	0	40	50	80	0	20	0
20	100	80	100	90	80	0	0	100	20	0	80	20
21	100	60	100	70	60	50	30	40	50	0	20	10
22	80	70	50	80	70	10	40	40	70	0	60	60
23	80	100	100	80	100	50	100	30	70	10	0	10
24	100	100	100	90	70	40	0	20	50	40	0	0
25	100	80	100	100	90	10	30	70	0	10	60	0
26	60	60	80	100	80	30	40	40	30	30	20	0
27	70	70	100	100	60	60	50	40	60	10	0	0
28	100	100	100	80	100	30	70	50	80	0	30	20
29	100	100	100	50	80	40	50	40	80	0	0	40
30	80	70	100	80	100	60	40	100	80	20	0	0
31	70	70	60	100	80	60	100	50	100	80	10	60
32	100	100	100	90	100	70	50	40	70	0	0	30
33	70	80	100	90	100	60	60	0	100	40	20	80
34	100	80	50	100	70	70	70	70	60	50	30	50
35	70	100	100	100	60	60	60	30	80	30	40	20
36	100	100	80	70	90	50	40	40	70	0	30	0
37	90	70	50	80	100	40	50	50	80	0	0	10
38	100	100	100	80	90	0	40	20	40	0	20	10
39	100	100	100	100	100	40	30	100	60	0	30	50
40	100	100	90	100	80	40	30	20	80	30	20	40
41	80	80	90	100	100	30	30	30	80	80	40	70
42	90	70	100	100	100	40	30	40	100	70	20	60
43	100	100	90	60	100	60	20	30	100	50	40	50
44	100	100	100	80	90	70	10	0	50	0	20	40
45	90	80	80	70	100	50	40	0	100	3	0	60
46	100	40	90	100	100	10	20	20
47	80	90	60	100	30	70	80	10
48	50	100	100	90	100	70	60	40
49					100	40	20	30
50					70	30	50	40
51					60	30	60	60
52					80	30	50	30
53					100	20	40	20
54					100	30	40	20
55					50	10	20	40
56					80	30	10	40
57					100	30	40	20
58					70	0	40	0
59					100	0	70	0
60					100	30	2	40
61					60	20	0	10
62					60	10	0	30
63					40	20	0	20
64					70	0	0	0
65					100	0	0	20
66					100	0	0	30
67					100	70	0	20
68					60	80	0	30
69					70	0	40	50
70					100	40	0	20
71					90	20	0	30
72					100	50	100	40
73					90	40	40	70
74					100	60	40	30
75					70	60	40	40
76					100	100	0	100
77					40	60	50	40
78					100	60	40	30
79					100	0	40	70
80					60	100	40	100
81					100	40	50	50
82					100	50	20	30
83					70	20	30	0
84					80	40	30	0
85						80	50	80
86						100	50	70
87						100	100	40
Average	88.5417	85.8333	88.125	87.2917	83.0952	45.0575	38.9885	39.1954	66.6667	22.5111	20	23.5556

## Sheet: Fig. 2C
Figure 2. SEL-12 is required for mitochondrial structural maintenance and mechanosensation.
	% Positive response to soft touch
n	Wildtype	sel-12(ty11)	myo3P::SEL-12; sel-12(ty11)	rab3P::SEL-12; sel-12(ty11)
1	10	10	20	100
2	90	10	100	70
3	70	60	40	80
4	80	30	20	70
5	90	10	40	100
6	100	80	30	100
7	100	60	40	100
8	90	50	10	100
9	100	100	50	100
10	70	10	30	70
11	60	0	20	70
12	100	30	0	0
13	90		30	80
14	80		40	70
15	60		30	80
16	100		30	80
17	100		80
18	60		60
19	80		40
20	80		80
21	60		30
22	70		40
23	100		0
24	70		30
25	90		20
26	80		40
27	60		20
28	100		60
29	80		100
30	100		100
31	80		100
32	100
33	100
34	70
35	60
36	90
37	100
38	90
39	100
40	80
41	100
42	100
43	100
44	90
45	100
46	100
47	30
48	100
49	100
50	70
51	60
52	80
53	100
54	100
55	50
56	80
57	100
58	70
59	100
60	100
61	60
62	60
63	40
64	70
65	100
66	100
67	100
68	60
69	70
70	100
71	90
72	100
73	90
74	100
75	70
76	100
77	40
78	100
79	100
80	60
81	100
82	100
83	70
84	80
Average	83.0952	37.5	42.9032	79.375
