# Supplementary material for: Presenilin mutations deregulate mitochondrial Ca2+ homeostasis and metabolic activity causing neurodegeneration in Caenorhabditis elegans
Source: eLife journal article supplement (doi:10.7554/elife.33052), 2018-07-10
Supplement: supp [file elife-33052-supp-v1.zip › elife_poa_e33052_Figure_3_figure_supplement_1_source_data_1.xlsx]

## Sheet: Fig. S2A
Figure 3-figure supplement 1. SEL-12 has a tissue-specific but protease independent role in neuronal health maintenance.
	Sprouts / ALM soma
	Wildtype	sel-12(ty11)	myo3P::SEL-12; sel-12(ty11)	rab3P::SEL-12; sel-12(ty11)
n	0	3	1	1
1	0	4	3	1
2	1	4	0	1
3	1	2	1	0
4	1	3	3	0
5	1	4	2	0
6	1	2	3	2
7	1	7	1	0
8	1	3	5	1
9	1	3	1	0
10	1	0	0	1
11	1	4	4	0
12	1	5	0	0
13	0	4	3	0
14	0	0	3	2
15	0	3	2	2
16	0	3	3	0
17	1	3	3	5
18	0	2	2	2
19	0	2	4	0
20	0	2	3	0
21	1	2	3	0
22	0	7	5	1
23	0	4	5	2
24	0	5	4	5
25	0	3	4	3
26	0	4	5	2
27	0	5	5	0
28	1	4	3	0
29	0	2	1	0
30	0	1	4	1
31	0	5	5	3
32	1	2	2	1
33	1	4	0	5
34	2	4	3	0
35	1	5	4	3
36	1	6	0	0
37	1	2	1	5
38	1	1	0	0
39	1	5	1	0
40	1	2	3	2
41	0	3	2	1
42	1	0	4	0
43	1	8	4	0
44	1	5	4	0
45	1	1	0	0
46	1	5	3	5
47	0	1	3	0
48	0	4	2	1
49	0	1	0	0
50	1	4	1	0
51	0	5	5	0
52	0	6	0	0
53		4	4	4
54		4	1	2
55		3	5	3
56		4	5	0
57		3	1	0
58		0	4	2
59		5	4	0
60		1	3	0
61		4	2	2
62		2	2	1
63		3	3	1
64		5	1	2
65		1	2	5
66		1	3	2
67		1	3	0
68		1	1	0
69		2	3	3
70		1	1	0
71		1	3	0
72		2	1	3
73		1	4	4
74		1	2
75		1	3
76		2	0
77		1	0
78		2	1
79		2	2
80		3	3
81		1	2
82		0	2
83		0	1
84		1	2
85		1	2
86		1	2
87		1	2
88		1	3
89		2	3
90		1	3
91		0	1
92		1	2
93		5	3
94		2	1
95		5	1
96		3	6
97		4	5
98		4	1
99		1	4
100		4	1
101		3	3
102		3	5
103		4	6
104		4
105		3
106		2
107		5
108		2
109		1
110		5
111		1
112		2
113		2
114		2
Average	0.566038	2.75652	2.50962	1.24324

## Sheet: Fig. S2B
Figure 3-figure supplement 1. SEL-12 has a tissue-specific but protease independent role in neuronal health maintenance.
	% Positive response to soft touch
n	Wildtype	sel-12(ar131)	sel-12(ar131); WT SEL-12	sel-12(ar131); D->A SEL-12
1	100	0	80	100
2	70	20	100	100
3	80	30	70	100
4	50	40	90	100
5	90	50	80	30
6	100	30	100	70
7	90	100	40	60
8	80	20	100	60
9	80	20	100	100
10	80	40	100	70
11	100	40	50	100
12	100	100	100	80
13	100	10	100	90
14	80	50	100	70
15	70	40	30	60
16	100	80	100	100
17	100	50	100	80
18	100	100	100	30
19	80	20	70	70
20	70	40	80	60
21	80	30	100	100
22	100	20	50	100
23	70	30	100	90
24	80	60	100	60
25	70	40	80	100
26	80	70	80	70
27	80	50	100	70
28	80	100	50	0
29	100	20	70	60
30	100	100	100	80
31			100	60
32			90	80
33			100	100
34			70	80
35			100	100
36			60	100
37			30	80
38			100	100
39			100	100
40			100	100
41			70	100
42			100	60
43			60	100
44			100	40
45			30	60
46			100	80
47			100	100
48			100	100
49			90	100
50			90	50
51			100	100
52			100	100
53			90	100
54			100	100
55			40	70
56			80	70
57			100	100
58			100	10
59			100	60
60			90	80
61			70	70
62			80	80
63			100	50
64			100	100
65			80	100
66			100	50
67			100
68			60
69			70
70			100
71			40
72			80
73			100
74			100
75			100
76			40
77			100
78			100
79			100
80			70
81			100
82			60
83			60
84			100
85			100
86			80
87			100
88			70
89			90
90			90
91			100
92			60
93			100
94			90
95			70
96			80
97			100
98			100
99			100
100			100
101			80
102			100
103			100
104			100
105			50
106			80
107			100
108			80
Average	85.3333	46.6667	85.5556	78.6364
