# Supplementary material for: Presenilin mutations deregulate mitochondrial Ca2+ homeostasis and metabolic activity causing neurodegeneration in Caenorhabditis elegans
Source: eLife journal article supplement (doi:10.7554/elife.33052), 2018-07-10
Supplement: supp [file elife-33052-supp-v1.zip › elife_poa_e33052_Figure_3_source_data_1.xlsx]

## Sheet: Fig. 3B
Figure 3. Loss of SEL-12 function results in neurodegeneration.
Number of sprouts/ ALM neuronal soma
	Larval Stage 4 (L4)		Day 1 of Adulthood		Day 3 of Adulthood
n	Wildtype	sel-12(ty11)	Wildtype	sel-12(ty11)	Wildtype	sel-12(ty11)
1	1	0	0	1	0	1
2	0	0	0	1	0	2
3	0	0	1	1	1	1
4	1	1	1	1	0	8
5	1	0	1	2	1	5
6	1	0	1	1	0	4
7	1	1	1	1	0	3
8	0	0	1	2	0	2
9	0	0	1	1	0	3
10	1	1	1	1	1	1
11	1	1	1	1	2	1
12	0	1	1	2	0	2
13	0	0	1	1	1	3
14	0	0	0	2	0	0
15	0	1	0	2	0	2
16	0	0	0	3	2	3
17	0	1	0	1	1	0
18	1	0	1	0	1	3
19	0	0	0	0	1	0
20	0	1	0	1	1	3
21	0	1	0	1	1	1
22	0	0	1	1	0	4
23	0	0	0	1	0	4
24	1	1	0	1	0	0
25	0	1	0	2	1	3
26	0	0	0	1	0	4
27	0	0	0	0	0	5
28	0	0	0	1	1	0
29	0	0	1	5	4	4
30	1	1	0	2	0	5
31			0	5	12	5
32			0	3	1	5
33			1	4	4	4
34			1	4	1	1
35			2	1	0	5
36			1	4	1	2
37			1	3	2	0
38			1	3	1	3
39			1	4	0	5
40			1	4	1	2
41			1	3	1	6
42			0	2	0	4
43			1	5		3
44			1	2		5
45			1	1		2
46			1	5		3
47			1	1		4
48			0	2		6
49			0	2		10
50			0	2		5
51			1	2		2
52			0			6
53			0			5
54			0			5
55						5
56						4
57						7
58						12
59						3
60						6
61						1
62						5
63						0
64						0
65						0
66						0
Average	0.333333	0.4	0.555556	2	1.02381	3.30303

## Sheet: Fig. 3C
Figure 3. Loss of SEL-12 function results in neurodegeneration.
	Number of axons with waves/10 axons
	Larval Stage 4 (L4)		Day 1 of Adulthood		Day 3 of Adulthood
n	Wildtype	sel-12(ty11)	Wildtype	sel-12(ty11)	Wildtype	sel-12(ty11)
10	0	1	2	4	5	5
20	0	0	2	6	6	4
30	0	0	3	6	3	8
40	1	1	3	6	3	9
50	1	1	3	7	5	9
60	0	0	2	8	5	10
70			2	9	5	7
80			1	9	4	7
90			2	7	3	8
100			2	7	3	7
110			2	8		7
120			3			7
130			2
140			3
150			3
160			3
Average	0.333333	0.5	2.375	7	4.2	7.33333

## Sheet: Fig. 3D
Figure 3. Loss of SEL-12 function results in neurodegeneration.
	Number of axons with lesions/10 axons
	Larval Stage 4 (L4)		Day 1 of Adulthood		Day 3 of Adulthood
n	Wildtype	sel-12(ty11)	Wildtype	sel-12(ty11)	Wildtype	sel-12(ty11)
10	1	0	1	5	4	6
20	0	0	1	5	4	6
30	0	0	2	6	4	8
40	0	0	2	5	3	8
50	0	0	0	5	5	8
60	0	0	0	6	4	9
70			2	6	4	7
80			1	5	3	7
90			3	7	3	8
100			2	7	3	8
110			1	7		8
120			1			8
130			2
140			1
150			1
160			1
Average	0.166667	0	1.3125	5.81818	3.7	7.58333

## Sheet: Fig. 3E
Figure 3. Loss of SEL-12 function results in neurodegeneration.
	Number of axons with breaks/10 axons
	Larval Stage 4 (L4)		Day 1 of Adulthood		Day 3 of Adulthood
n	Wildtype	sel-12(ty11)	Wildtype	sel-12(ty11)	Wildtype	sel-12(ty11)
10	0	0	0	2	0	2
20	0	0	0	2	0	2
30	0	0	0	3	0	3
40	0	0	0	3	0	3
50	0	0	0	3	0	3
60	0	0	1	2	0	2
70			0	1	0	5
80			0	1	0	5
90			0	2	0	5
100			0	1	0	4
110			0	1		4
120			0			4
130			1
140			0
150			0
160			0
Average	0	0	0.125	1.90909	0	3.5
