# Supplementary material for: Presenilin mutations deregulate mitochondrial Ca2+ homeostasis and metabolic activity causing neurodegeneration in Caenorhabditis elegans
Source: eLife journal article supplement (doi:10.7554/elife.33052), 2018-07-10
Supplement: supp [file elife-33052-supp-v1.zip › elife_poa_e33052_Figure_4_figure_supplement_1_source_data_1.xlsx]

## Sheet: Fig. S3A
Figure 4-figure supplement 1. Loss of gamma-secretase function does not result in neurodegenerative morphologies.
	Sprouts / ALM soma
n	Wild type	sel-12(ty11)	sel-12(ty11); WT SEL-12	sel-12(ty11); D->A SEL-12
1	0	1	0	0
2	0	1	0	0
3	1	1	0	1
4	1	1	0	1
5	1	2	0	1
6	1	1	0	3
7	1	1	0	0
8	1	2	2	0
9	1	1	0	0
10	1	1	1	0
11	1	1	0	0
12	1	2	1	0
13	1	1	0	0
14	0	2	1	0
15	0	2	2	1
16	0	3	0	0
17	0	1	1	0
18	1	0	1	0
19	0	0	0	0
20	0	1	0	0
21	0	1	1	0
22	1	1	0	0
23	0	1	0	0
24	0	1	1	0
25	0	2	0	0
26	0	1	0	0
27	0	0	0	1
28	0	1	2	0
29	1	5	0	0
30	0	2	0	1
31	0	5	1
32	0	3	0
33	1	4	0
34	1	4
35	2	1
36	1	4
37	1	3
38	1	3
39	1	4
40	1	4
41	1	3
42	0	2
43	1	5
44	1	2
45	1	1
46	1	5
47	1	1
48	0	2
49	0	2
50	0	2
51	1
52	0
53	0
Average	0.566038	2	0.424242	0.3

## Sheet: Fig. S3B
Figure 4-figure supplement 1. Loss of gamma-secretase function does not result in neurodegenerative morphologies.
	Number of axons with waves/10 axons
n	Wild type	sel-12(ty11)	sel-12(ty11); WT SEL-12	sel-12(ty11); D->A SEL-12
10	2	4	3	3
20	2	6	2	2
30	3	6	2	4
40	3	6	2	4
50	3	7	2	3
60	2	8	3	3
70	2	9	2
80	1	9
90	3	7
100	3	7
110	3	8
120	3
130	4
140	3
150	3
160	3
Average	2.6875	7	2.28571	3.16667

## Sheet: Fig. S3C
Figure 4-figure supplement 1. Loss of gamma-secretase function does not result in neurodegenerative morphologies.
	Number of axons with lesions/10 axons
n	Wildtype	sel-12(ty11)	sel-12(ty11); WT SEL-12	sel-12(ty11); D->A SEL-12
10	1	5	3	4
20	1	5	3	3
30	2	6	3	3
40	2	5	4	3
50	0	5	2	4
60	0	6	2	2
70	2	6	3
80	1	5	4
90	3	7
100	2	7
110	1	7
120	1
130	2
140	1
150	1
160	1
Average	1.3125	5.81818	3	3.16667

## Sheet: Fig. S3D
Figure 4-figure supplement 1. Loss of gamma-secretase function does not result in neurodegenerative morphologies.
	Number of axons with breaks/10 axons
n	Wildtype	sel-12(ty11)	sel-12(ty11); WT SEL-12	sel-12(ty11); D->A SEL-12
10	0	2	0	0
20	0	2	0	0
30	0	3	0	0
40	0	3	0	0
50	0	3	0	0
60	1	2	0	1
70	0	1	1
80	0	1
90	0	2
100	0	1
110	0	1
120	0	0
130	1
Average	0.0833333	1.75	0.142857	0.166667
