# Supplementary material for: Presenilin mutations deregulate mitochondrial Ca2+ homeostasis and metabolic activity causing neurodegeneration in Caenorhabditis elegans
Source: eLife journal article supplement (doi:10.7554/elife.33052), 2018-07-10
Supplement: supp [file elife-33052-supp-v1.zip › elife_poa_e33052_Figure_4_source_data_1.xlsx]

## Sheet: Fig. 4A
Figure 4. Notch signaling and gamma-secretase activity is not required for mechanosensation or mechanosensory neuron morphology.
	% Positive response to soft touch
	Day 1 of Adulthood			Day 2 of Adulthood			Day 2 of Adulthood
n	Wild type	lin-12 mutant	glp-1 mutant	Wild type	lin-12 mutant	glp-1 mutant	Wild type	lin-12 mutant	glp-1 mutant
1	10	60	70	80	60	100	100	10	70
2	90	70	100	30	80	80	60	80	80
3	70	80	100	30	100	100	50	70	100
4	80	100	100	100	60	100	90	70	100
5	90	100	50	100	100	100	90	50	100
6	100	100	100	60	100	100	70	100	80
7	100	100	70	60	40	10	70	30	70
8	90	100	80	80	70	60	70	80	70
9	100	70	90	80	50	40	100	60	100
10	70	70	50	80	70	100	70	90	100
11	60	100	100	70	80	80	40	80	100
12	100	100	70	100	40	20	50	90	100
13	90	100	60	60	50	60	70	90	70
14	80	60	70	60	100	100	80	70	30
15	60	100	80	60	60	70	60	40	100
16	100	100	90	50	60		10
17	100	100	80	80	60		10
18	60	100	100	80	70		70
19	80	70	80	70			80
20	80	100	100	60			20
21	60	80	70	60			50
22	70	100	90	40			70
23	100	100	80	90			70
24	70	100	70	70			50
25	90	70	80	70			0
26	80	100	100	50			30
27	60	100	70	70			60
28	100	100	40	80			80
29	80	100	90	80			80
30	100	10	60	60			80
31	80	80	50	60			100
32	100	40	100	100			70
33	100	100	100	70			100
34	70	100	80	60			60
35	60	60	80	80			80
36	90	100	60	80			80
37	100	100	100	100			40
38	90	90	50	100			60
39	100	80	50	60			80
40	80	100		70			80
41	100	70		40			100
42	100	70		100			100
43	100			20			50
44	90			40			100
45	100			80			100
46	100
47	30
48	100
49	100
50	70
51	60
52	80
53	100
54	100
55	50
56	80
57	100
58	70
59	100
60	100
61	60
62	60
63	40
64	70
65	100
66	100
67	100
68	60
69	70
70	100
71	90
72	100
73	90
74	100
75	70
76	100
77	40
78	100
79	100
80	60
81	100
82	100
83	70
84	80
Average	83.0952	86.4286	78.4615	69.3333	69.4444	74.6667	67.3333	67.3333	84.6667

## Sheet: Fig. 4B
Figure 4. Notch signaling and gamma-secretase activity is not required for mechanosensation or mechanosensory neuron morphology.
	% Positive response to soft touch
	Day 1 of Adulthood		Day 2 of Adulthood		Day 3 of Adulthood
n	Wild type	g-sec inhibited	Wild type	g-sec inhibited	Wild type	g-sec inhibited
1	10	80	80	100	100	100
2	90	100	30	70	60	80
3	70	80	30	100	50	100
4	80	100	100	80	90	80
5	90	70	100	100	90	90
6	100	60	60	90	70	70
7	100	100	60	90	70	90
8	90	100	80	40	70	70
9	100	80	80	20	100	100
10	70	100	80	80	70	100
11	60	100	70	80	40	50
12	100	80	100	80	50	100
13	90	80	60	50	70	60
14	80	80	60	100	80	70
15	60	100	60	50	60	60
16	100	60	50	50	10	80
17	100	80	80	50	10	60
18	60	100	80	70	70	60
19	80	100	70	80	80	80
20	80	100	60	60	20	70
21	60	100	60	70	50	50
22	70	100	40	70	70	60
23	100	40	90	70	70	100
24	70	100	70	80	50	80
25	90	100	70	100	0	100
26	80	100	50	80	30	80
27	60	70	70	100	60	80
28	100	100	80	80	80	80
29	80	100	80	70	80	80
30	100	100	60	60	80	80
31	80	70	60	80	100	80
32	100	100	100	80	70	100
33	100	40	70	100	100	60
34	70	100	60	70	60	100
35	60	100	80	100	80	70
36	90	70	80	100	70	80
37	100	60	100	100	80	60
38	90	100	100	60	40	100
39	100	100	60	70	60	80
40	80	40	70	70	80	90
41	100	80	40	70	80	80
42	100	100	100	70	100	100
43	100	100	20	100	100	40
44	90	100	40	90	80	80
45	100	80	80	100	100	80
46	100	70		90		70
47	30	90		100		70
48	100	100		100		60
49	100	70		100
50	70	100		100
51	60	100		100
52	80	90
53	100	100
54	100	90
55	50	100
56	80	100
57	100	100
58	70	80
59	100	100
60	100	70
61	60	70
62	60	70
63	40	80
64	70	100
65	100	80
66	100	90
67	100
68	60
69	70
70	100
71	90
72	100
73	90
74	100
75	70
76	100
77	40
78	100
79	100
80	60
81	100
82	100
83	70
84	80
Average	83.0952	87.1212	69.3333	79.8039	67.3333	78.3333

## Sheet: Fig. 4C
Figure 4. Notch signaling and gamma-secretase activity is not required for mechanosensation or mechanosensory neuron morphology.
	Sprouts / ALM soma
n	Wild type	g-sec inhibited
1	1	0
2	0	0
3	1	0
4	0	1
5	1	0
6	2	1
7	0	2
8	0	1
9	0	1
10	1	0
11	1	3
12	3	0
13	0	2
14	0	0
15	1	1
16	1	0
17	0	1
18	1	0
19	0	0
20	0	1
21	0	0
22	1	1
23	1	0
24	0	0
25	1	1
26	0	1
27	0	0
28	1	0
29	0	1
30	1	0
31	0	0
32	1	1
33	0	0
34	1	0
35	0	1
36	0	0
37	0	1
38	1	0
39	1	0
40	1	0
41	0	0
42	1	1
43	0	0
44	0	0
45	4	0
46	0	0
47	1	1
48	0	1
49	0	0
50	1	0
51	0	0
52	0	0
53	0	0
54	0	1
55	0	0
56	1	1
57	0	0
58	1	1
59	0	0
60	0	0
Average	0.533333	0.45

## Sheet: Fig. 4D
Figure 4. Notch signaling and gamma-secretase activity is not required for mechanosensation or mechanosensory neuron morphology.
	% positive response to soft touch
n	Wildtype	sel-12(ty11)	sel-12(ty11); WT SEL-12	sel-12(ty11); D->A SEL-12
1	100	50	100	100
2	100	10	100	100
3	80	30	60	90
4	100	10	100	90
5	80	70	100	90
6	90	10	60	100
7	100	20	100	70
8	100	60	100	100
9	90	30	100	100
10	70	80	100	100
11	20	40	70	100
12	30	40	100	100
13	50	40	50	100
14	0	40	100	100
15	40	60	80	100
16	100	50	30	100
17	70	40	100	70
18	80	50	60	80
19	60	40	100	100
20	80	20	100	100
21	90	40	50	80
22	100	20	100	100
23	100	100	100	30
24	100	20	50	100
25	100	100	40	90
26	100	0	100	60
27	100	10	80	80
28	80	50	90	90
29	10	40	80	60
30	100	10	90	100
31	100	50	80	100
32	100	60	100	70
33	100	40	100	60
34	100	50	70	100
35	100	40	20	60
36	100	40	100	80
37	80	0	100	90
38	50	10	100	100
39	70	20	80	80
40	50		100	70
41	80		70	80
42	70		100	80
43	100		100	100
44	100		30	50
45	70		100	100
46			80	60
47			80	80
48			100	100
49			100	60
50			50	100
51			100	100
52			70	100
53			80	100
54			100	0
55			40	80
56			100	100
57			50	100
58			100	70
59			100	80
60			100	100
61			90	60
62			100	80
63			90
64			100
65			60
66			90
67			100
68			90
69			40
70			40
71			90
Average	79.7778	38.2051	82.8169	85
