# Supplementary material for: Presenilin mutations deregulate mitochondrial Ca2+ homeostasis and metabolic activity causing neurodegeneration in Caenorhabditis elegans
Source: eLife journal article supplement (doi:10.7554/elife.33052), 2018-07-10
Supplement: supp [file elife-33052-supp-v1.zip › elife_poa_e33052_Figure_5_figure_supplement_1_source_data_1.pdf]

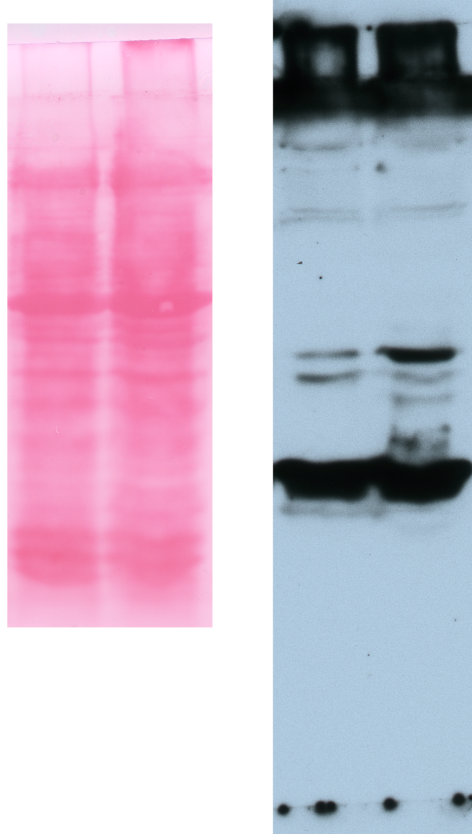

Figure 5-figure supplement 1. Western analysis of pan-neuronal expression of Abeta1-42 in *C. elegans*. Source data.
