# Supplementary material for: Presenilin mutations deregulate mitochondrial Ca2+ homeostasis and metabolic activity causing neurodegeneration in Caenorhabditis elegans
Source: eLife journal article supplement (doi:10.7554/elife.33052), 2018-07-10
Supplement: supp [file elife-33052-supp-v1.zip › elife_poa_e33052_Figure_5_source_data_1.xlsx]

## Sheet: Fig. 5A
Figure 5. Expression of human Abeta1-42 peptide in the the nervous system results in functional loss dissimilar from sel-12 mutants.
% Positive response to soft touch
n	Wild type	sel-12(ty11)	Abeta
1	100	20	20
2	100	20	20
3	80	40	10
4	60	20	10
5	100	0	50
6	100	10	80
7	70	40	90
8	80	60	30
9	20	0	100
10	30	30	30
11	60	40	10
12	100	0	40
13	100	40	30
14	100	100	50
15	70	60	40
16	100	0	60
17	100	60	60
18	80	100	30
19	70		10
20	100		100
21	80		80
22	80		80
23	50		60
24	90		60
25	80		10
26	100		70
27			40
28			30
29			20
30			70
31			70
32			20
33			30
34			20
35			10
36			40
37			10
38			60
39			40
40			60
41			40
42			100
43			80
44			10
45			30
46			100
47			40
48			80
49			60
Average	80.7692	35.5556	46.7347

## Sheet: Fig. 5B
Figure 5. Expression of human Abeta1-42 peptide in the the nervous system results in functional loss dissimilar from sel-12 mutants.
	Sprouts / ALM soma
n	Wild type	sel-12(ty11)	Abeta
1	0	3	0
2	0	2	0
3	0	1	0
4	1	0	0
5	0	2	0
6	0	1	0
7	0	1	0
8	0	2	0
9	1	4	1
10	1	1	1
11	0	3	0
12	0	3	1
13	0	1	0
14	0	4	2
15	0	5	0
16	0	0	0
17	0	2	0
18	0	3	0
19	0	0	0
20	0	1	0
21	1	0
22	0	2
23	0	5
24	0	1
25	0	1
26	1	3
27	0	2
28	0	1
29	0	4
30	0	0
Average	0.166667	1.93333	0.25

## Sheet: Fig. 5C
Figure 5. Expression of human Abeta1-42 peptide in the the nervous system results in functional loss dissimilar from sel-12 mutants.
Number of axons with breaks/10 axons
n	Wild type	sel-12(ty11)	Abeta
10	0	1	0
20	0	3	0
30	0	1	0
40	0	1	0
50	0	2	0
60	0		0
Average	0	1.6	0

## Sheet: Fig. 5D
Figure 5. Expression of human Abeta1-42 peptide in the the nervous system results in functional loss dissimilar from sel-12 mutants.
% ALM neurons with fragmented mitchondria
	Wild type	sel-12(ty11)	Abeta
	20	50	20
	13.3333	60	30
Average	16.6667	55	25
n per genotype analyzed	60	45	75

## Sheet: Fig. 5E
Figure 5. Expression of human Abeta1-42 peptide in the the nervous system results in functional loss dissimilar from sel-12 mutants.
	Mito::GCAMP/mcherry fluorescence intensity normailsed to WT
n	Wild type	sel-12(ty11)	Abeta
1	1.93288	2.26743	0.41289
2	0.305071	2.35159	0.859224
3	1.35202	1.85517	0.556106
4	0.880955	0.63046	1.69251
5	0.735433	1.13794	0.752226
6	0.908754	0.978167	0.169572
7	0.414315	1.83732	0.964924
8	1.94161	1.25575	1.43229
9	1.67932	1.47823	1.10883
10	1.39024	1.42689	0.934446
11	0.833891	3.52736	1.18546
12	0.552919		0.411798
13	0.667122		0.584042
14	0.875458		0.589617
15	0.53001		0.54763
16			2.75039
17			1.00972
18			0.622901
19			0.61469
20			1.73753
21			0.954519
22			0.727458
Average	1	1.70421	0.937217
