# Supplementary material for: Presenilin mutations deregulate mitochondrial Ca2+ homeostasis and metabolic activity causing neurodegeneration in Caenorhabditis elegans
Source: eLife journal article supplement (doi:10.7554/elife.33052), 2018-07-10
Supplement: supp [file elife-33052-supp-v1.zip › elife_poa_e33052_Figure_6_figure_supplement_1_source_data_1.xlsx]

## Sheet: Fig. S4A
Figure 6-figure supplement 1. Loss of ryanodine receptors results in the improvement of neurodegeneration in sel-12 null animals.
	Mito::GCAMP/mcherry fluorescence intensity normailsed to WT
n	Wild type	sel-12(ty11)	unc-68;sel-12(ty11)
1	1.98209	1.14431	1.91808
2	1.28009	1.87142	1.70257
3	1.08794	1.09657	2.08248
4	0.636124	3.01683	0.402976
5	0.58076	1.20161	0.342843
6	0.684722	2.71818	0.981584
7	0.540544	1.42072	0.781684
8	1.15832	3.50853	0.314159
9	0.448415	3.28745	1.08814
10	0.71065	3.42583	1.89248
11	1.04953	2.78693	1.03132
12	1.84081	4.04409	1.43418
13			1.23907
14			0.956412
15			1.05292
16			1.46035
17			1.60279
Average	1	2.46021	1.19318

## Sheet: Fig. S4B
Figure 6-figure supplement 1. Loss of ryanodine receptors results in the improvement of neurodegeneration in sel-12 null animals.
	Day 1 Basal OCR (pmol/min/worms)
n	Wild type	sel-12(ty11)	unc-68; sel-12(ty11)
1	7.43365	6.5422	5.08036
2	4.1263	4.78924	9.32288
3	3.32597	7.23163	6.66448
4	4.58817	7.62394	5.90357
5	4.82971	5.998	6.18109
6	8.94446	9.79065	6.71039
7	8.01867	7.31857	5.53677
8	2.81662	5.93378	6.86762
9	4.12214	4.56246	8.58358
10	4.66616	5.18742	8.18643
11	5.62469	6.069	4.35478
12	3.43936	8.83327	4.6393
13	4.16281	7.60103	7.32157
14	5.13899	5.63913	5.29606
15	2.86657	7.20109	4.85606
16	7.34568	7.41625	7.66718
17	5.30028	8.5758	9.48602
18	7.87289	11.4826	8.7192
19	5.45857	6.95283	5.43703
20	4.19053	6.39997	5.94177
21	9.01568	13.8734	6.31578
22	6.689	5.5693	7.04106
23	5.49729	9.43333	9.72207
24	4.87332	11.3284	6.1031
25	4.57192	6.73065	8.20893
26	9.61666	9.23267	6.53388
27	5.17038	7.21611	5.70173
28	3.64854	8.46641	3.99494
29	3.63431	5.18015	6.07086
30	4.19234	5.72161	3.2727
31	6.16607	2.87309	5.75376
32	4.13791	15.9418	6.02186
33	4.64903	15.1622	5.60705
34	3.99995	6.24489	6.6008
35	5.19627	13.1831	5.21593
36	4.22672	18.7781	3.94075
37	3.36157	12.5053	5.86937
38	3.60717	11.4633	6.76194
39	3.24111	19.0353	8.14715
40	2.83818	12.6876	6.60766
41	5.23762	12.0589	3.40957
42	4.11972	8.30212	4.02321
43	4.18886	9.88362	4.73443
44	5.11066	5.84814	7.96023
45	2.8744	6.6186	5.29289
46			2.5221
47			3.23943
48			5.67415
49			3.38312
50			4.2654
51			3.29801
52			3.77544
53			7.33797
54			2.22389
55			8.72871
56			4.05127
57			6.14618
58			7.75125
59			4.09532
60			2.61666
61			3.82712
62			5.33406
63			7.22285
64			4.77317
65			3.38111
66			4.17668
67			1.69892
68			3.41077
69			4.72635
70			3.98863
71			2.72475
72			4.78905
73			5.15804
74			3.44001
75			3.55351
76			4.09002
77			5.81569
78			8.9746
79			7.77332
80			8.55393
81			3.61217
82			6.86937
83			5.76272
84			7.8477
85			9.64251
86			4.23469
87			4.12525
88			3.44171
89			4.85768
90			4.79639
Average	4.98082	8.76637	5.59311

## Sheet: Fig. S4C
Figure 6-figure supplement 1. Loss of ryanodine receptors results in the improvement of neurodegeneration in sel-12 null animals.
	Day 1 Max OCR (pmol/min/worms)
n	Wild type	sel-12(ty11)	unc-68; sel-12(ty11)
1	3.43912	12.3697	6.72387
2	5.4409	18.49	7.58189
3	7.92943	11.2027	5.7492
4	7.97906	14.778	7.68366
5	3.20644	13.2831	6.43608
6	4.07196	2.87309	6.02487
7	3.41625	15.9418	5.67727
8	5.68988	15.1622	6.97092
9	7.25849	6.24489	8.04793
10	4.00004	13.1831	7.27695
11	3.68946	5.50772	3.73784
12	5.87703	6.45111	6.64632
13	8.51711	3.5993	6.11603
14	5.04659	5.39454	6.20088
15	4.7246	18.1761	6.3946
16	6.522	6.78172	6.49152
17	7.36195	12.7719	7.96883
18	7.19491	22.306	9.21675
19	7.13254	19.7876	8.13994
20	7.41658	11.2334	6.85539
21	4.90565	18.7781	8.76499
22	6.42017	12.5053	8.50755
23	5.66561	11.4633	9.4843
24	5.84506	19.0353	8.39557
25	6.95835	12.6876	8.97201
26	5.37951	5.74549	2.7672
27	4.75217	5.09921	8.09159
28	4.19133	6.79209	2.28045
29	4.67192	8.48925	6.86022
30	5.23518	10.9491	7.69987
31	7.15437	7.31009	5.09203
32	4.61023	17.7209	6.84101
33	3.265	25.3719	7.877
34	10.6654	8.79558	5.42863
35	10.1648	12.3921	8.37946
36	2.71114	12.0589	7.30703
37	3.16348	8.30212	9.48969
38	5.71566	9.88362	8.87565
39	5.14414	5.84814	12.9186
40	7.46943	6.6186	11.0765
41	3.39196	7.55778	2.94677
42	7.62592	9.27819	3.88911
43	10.6004	8.71558	5.67195
44	13.8451	5.85817	7.25438
45	11.03	6.25479	6.73174
46			4.16555
47			4.98032
48			4.87021
49			5.0849
50			4.1458
51			3.88309
52			5.26846
53			7.78063
54			4.44114
55			4.63041
56			1.11413
57			1.5923
58			8.44657
59			4.84253
60			5.68248
61			2.64447
62			11.625
63			12.3499
64			7.59529
65			10.8618
66			10.8933
67			8.41153
68			11.4184
69			10.0969
70			13.2583
71			5.23207
72			7.39256
73			8.22349
74			9.51358
75			7.79203
Average	6.14437	11.09	7.05653

## Sheet: Fig. S4D
Figure 6-figure supplement 1. Loss of ryanodine receptors results in the improvement of neurodegeneration in sel-12 null animals.
	Sprouts / ALM soma
n	Wild type	sel-12(ty11)	unc-68;sel-12(ty11)
1	0	4	1
2	0	1	1
3	1	5	0
4	1	0	0
5	1	4	0
6	1	5	0
7	1	5	1
8	1	1	0
9	1	3	0
10	2	1	0
11	1	4	0
12	0	1	0
13	1	4	0
14	0	2	1
15	1	3	0
16	0	1	0
17	1	3	4
18	0	2	1
19	1	3	1
20	0	2	0
21	1	2	0
22	1	1	2
23	0	5	0
24	1	0	1
25	1		6
26	0		1
27	1		2
28	1		0
29	0		3
30	0		0
Average	0.666667	2.58333	0.833333

## Sheet: Fig. S4E
Figure 6-figure supplement 1. Loss of ryanodine receptors results in the improvement of neurodegeneration in sel-12 null animals.
Number of axons with breaks/10 axons
n	Wild type	sel-12(ty11)	unc-68;sel-12(ty11)
10	0	2	1
20	0	2	0
30	0	2	0
40	0	3	0
50	0	1	0
60	1	2
Average	0.166667	2	0.2
