# Supplementary material for: Presenilin mutations deregulate mitochondrial Ca2+ homeostasis and metabolic activity causing neurodegeneration in Caenorhabditis elegans
Source: eLife journal article supplement (doi:10.7554/elife.33052), 2018-07-10
Supplement: supp [file elife-33052-supp-v1.zip › elife_poa_e33052_Figure_6_figure_supplement_2.pdf]

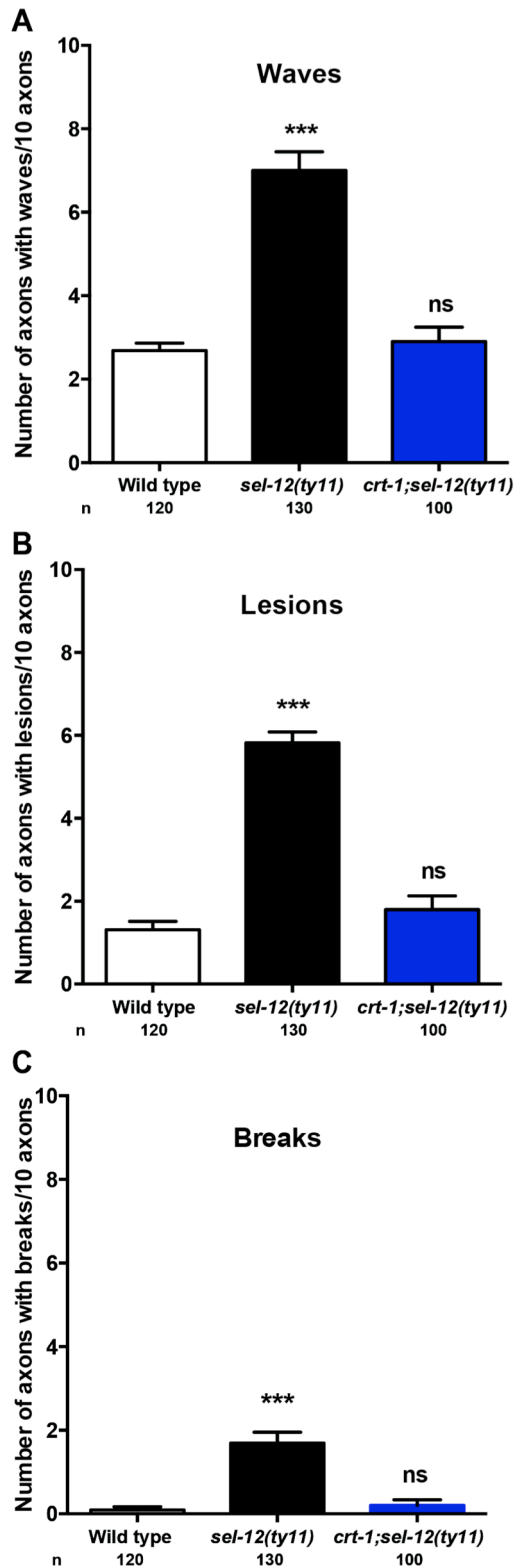

**Figure 6-figure supplement 2.**  
**Reduction of ER  $\text{Ca}^{2+}$  release improves the structure of mechanosensory neurons in *sel-12* animals.** Quantification of the frequency of (A) wave-like processes, (B) lesions and (C) breaks in ALM and PLM neuronal processes in wild type, *sel-12(ty11)* and *crt-1;sel-12(ty11)* animals at day 1 of adulthood. Neuronal morphology analysis is done using transgenic animals expressing *mec-4p::GFP (zdl5)*. n = number of animals analyzed per genotype. Data are displayed as mean  $\pm$  SEM, and all comparisons have been made to wild type animals unless otherwise indicated. ns  $P > 0.05$ , \*\*\* $P < 0.0001$  (One way ANOVA with Tukey test).
