# Supplementary material for: Presenilin mutations deregulate mitochondrial Ca2+ homeostasis and metabolic activity causing neurodegeneration in Caenorhabditis elegans
Source: eLife journal article supplement (doi:10.7554/elife.33052), 2018-07-10
Supplement: supp [file elife-33052-supp-v1.zip › elife_poa_e33052_Figure_6_figure_supplement_2_source_data_1.xlsx]

## Sheet: Fig. S5A
Figure 6-figure supplement 2. Reduction of ER Ca2+ release improves the structure of mechanosensory neurons in sel-12 animals.
	Number of axons with waves/10 axons
n	Wild type	sel-12(ty11)	crt-1;sel-12(ty11)
10	2	4	2
20	2	6	1
30	3	6	2
40	3	6	2
50	3	7	3
60	2	8	3
70	2	9	4
80	1	9	4
90	3	7	4
100	3	7	4
110	3	8
120	3
130	4
140	3
150	3
160	3
Average	2.6875	7	2.9

## Sheet: Fig. S5B
Figure 6-figure supplement 2. Reduction of ER Ca2+ release improves the structure of mechanosensory neurons in sel-12 animals.
	Number of axons with lesions/10 axons
n	Wild type	sel-12(ty11)	crt-1;sel-12(ty11)
10	1	5	3
20	1	5	3
30	2	6	2
40	2	5	1
50	0	5	2
60	0	6	2
70	2	6	3
80	1	5	1
90	3	7	1
100	2	7	0
110	1	7
120	1
130	2
140	1
150	1
160	1
Average	1.3125	5.81818	1.8

## Sheet: Fig. S5C
Figure 6-figure supplement 2. Reduction of ER Ca2+ release improves the structure of mechanosensory neurons in sel-12 animals.
	Number of axons with breaks/10 axons
n	Wild type	sel-12(ty11)	crt-1;sel-12(ty11)
10	0	2	0
20	0	2	0
30	0	3	0
40	0	3	0
50	0	3	1
60	1	2	0
70	0	1	0
80	0	1	1
90	0	2	0
100	0	1	0
110	0	1
120	0	0
130	1
Average	0.153846	1.75	0.2
