# Supplementary material for: Presenilin mutations deregulate mitochondrial Ca2+ homeostasis and metabolic activity causing neurodegeneration in Caenorhabditis elegans
Source: eLife journal article supplement (doi:10.7554/elife.33052), 2018-07-10
Supplement: supp [file elife-33052-supp-v1.zip › elife_poa_e33052_Figure_6_source_data_1.xlsx]

## Sheet: Fig. 6A
Figure 6. Reducing ER Ca2+ release in sel-12 mutants rescues mitochondrial disorganization and dysfunction, ectopic neurite sprouting and mechanosensory defects.
	Mito::GCAMP/mcherry fluorescence intensity normailsed to WT
n	Wild type	sel-12(ty11)	crt-1	crt-1; sel-12(ty11)
1	1.28822	3.29942	0.229949	0.440868
2	1.16278	4.24245	0.196808	0.929974
3	1.27628	2.59855	0.218842	0.682374
4	1.79319	2.3502	0.233747	0.374963
5	0.923438	4.93825	0.63974	0.639394
6	0.414255	5.32754	0.483932	0.725989
7	0.826758	4.45587	0.317149	0.832258
8	1.36084	5.1331	0.241191	0.515945
9	1.15004	2.30245	0.498357	0.656846
10	0.805523	3.43056	0.43676	0.476875
11	0.806161	2.07846	0.360435	0.407374
12	0.783493	4.14204	0.312714	0.539198
13	1.06988	3.74906	0.269836	0.739914
14	0.639614	3.63208	0.276906	0.427359
15	0.955185	2.63773	0.261017	0.455227
16	0.71044	1.77506	0.603036
17	0.762845	3.63994	0.263963
18	0.429017	2.94683	0.227234
19	0.918256	3.51884	0.210075
20	1.06881	2.96112	0.394644
21	1.1574	2.80431	0.570229
22	0.94087	2.04052	0.243501
23	1.12104	3.20886	0.322025
24	0.986037	3.25502	0.266086
25	2.16223		0.631462
26	0.875991		0.290427
27	0.909637		0.283173
28	0.699749		0.414323
29	0.57794		0.346341
30	1.42407
31	1.51188
32	0.526842
33	0.94762
34	0.999562
35	1.65431
36	0.47301
37	0.516042
38	1.11632
39	0.990821
40	1.96719
41	0.378633
42	0.86544
43	0.889037
44	1.16329
45	1.82089
Average	1.01824	3.35284	0.346341	0.589637

## Sheet: Fig. 6C
Figure 6. Reducing ER Ca2+ release in sel-12 mutants rescues mitochondrial disorganization and dysfunction, ectopic neurite sprouting and mechanosensory defects.
	% distribution of continuous vs discontinuous mitochondrial phenotype
		Wild type	sel-12(ty11)	crt-1;sel-12(ty11)
	Continuous	75	15	54
	Discontinuous	25	85	46
	n	48	96	93

## Sheet: Fig. 6D
Figure 6. Reducing ER Ca2+ release in sel-12 mutants rescues mitochondrial disorganization and dysfunction, ectopic neurite sprouting and mechanosensory defects.
	Basal OCR normalized to control
	Wild type	sel-12(ty11)	crt-1;sel-12(ty11)
	10.5211	9.41662	6.93685
	4.29848	3.19238	8.99297
	3.94392	6.38533	7.42192
	5.15493	7.15136	6.29929
	4.01566	6.66173	7.99426
	8.36851	7.5313	6.81893
	4.06729	5.02402	5.21327
	4.16505	6.69855	8.01339
	4.0898	6.54257	7.64673
	9.46561	6.28957	4.58881
	3.10673	5.66353	4.62164
	6.14543	7.29722	5.7017
	5.8267	5.83067	4.26585
	4.62712	5.06641	6.8496
	3.526	4.47447	5.37314
	4.79142	7.59004	2.81814
	7.35973	7.84091	3.61213
	6.20788	6.04262	3.88008
	4.87317	6.80449	3.70489
	5.29345	6.44696	3.12896
	3.68714	3.66835	4.27911
	5.21169	7.16797	3.45975
	5.40616	3.9367	4.03438
	2.63676	5.12053	1.38095
	6.73189	7.53329	3.80459
	3.23282	5.55353	4.15176
	3.63823	4.32553	2.86824
	4.64586	6.00438	4.14531
	5.64391	5.74859	1.82519
	4.42774	4.78115	2.19299
	7.34193	6.22392	5.67544
	6.31247	7.46224	5.26836
	7.09661	4.90488	5.18945
	6.54617	8.121	7.2923
	4.23991	6.22501	3.69645
	5.96679	6.53135	4.01732
	4.81542	6.0525	5.30164
	6.93375	4.16091	4.20409
	4.05515	5.42206	4.58972
	5.79042	9.97019	2.65047
	5.84983	5.84564	2.79035
	3.55169	6.72701	3.78915
	3.63374	7.65212	4.621
	4.89698	4.23549	4.12408
	3.90096	3.24995	3.75682
	4.39678	5.81984	4.8676
	6.32104	7.38689	5.34044
	3.11737	4.41057	1.99039
	2.97244	4.90705	4.36873
	4.96243	4.66672	6.78588
	4.58695	6.32648	4.42244
	6.09214	8.80981	5.84403
	4.52174	9.35797	2.45343
	4.19661	5.97324	3.47015
	6.32134	9.54612	4.01198
	5.10892	8.02063	5.95141
	3.41953	4.62752	3.86051
	3.94654	8.58957	3.40059
	3.44959	10.2903	6.23894
	1.94423	6.56102	7.10309
	5.83592	6.41057	5.37044
	5.95089	9.58015	4.51056
	3.64296	6.63088	3.80664
	3.07137	7.93572	5.51003
	5.57059	8.90129	2.40115
	5.42393	4.03095	5.03444
	6.39625	7.52975	6.30664
	4.97994	5.37549	4.80143
	4.64935	5.27911	3.65809
	5.37153	5.49224	7.00717
	3.24784	6.87475	3.80174
	4.49978	7.81334	5.24312
	3.19938	5.37199	3.52315
	4.47258	6.47418	3.45039
	4.90224	6.24275	3.99836
	5.19888	5.34741	6.30122
	3.40711	6.16667	5.44455
	5.39886	6.59463	5.4106
	5.83353	4.83627	4.70185
	3.63123	4.73169	5.72018
	2.94089	5.78773	4.31496
			5.96464
			6.709
			3.44174
			3.95369
			2.76719
			2.85294
			4.16279
			3.79608
			5.78753
Average	4.92623	6.33675	4.69837

## Sheet: Fig. 6E
Figure 6. Reducing ER Ca2+ release in sel-12 mutants rescues mitochondrial disorganization and dysfunction, ectopic neurite sprouting and mechanosensory defects.
	Maximal OCR normalized to control
	Wild type	sel-12(ty11)	crt-1;sel-12(ty11)
	4.89428	12.0232	6.9906
	8.48008	10.3219	3.96888
	5.82681	7.25221	11.0374
	6.21979	17.9809	5.79653
	5.52848	8.49764	9.19834
	7.10102	8.80245	9.89117
	7.01123	8.0435	7.63894
	7.5282	10.7834	12.0009
	7.78911	9.37297	10.0602
	5.75421	12.9481	10.3385
	6.41661	12.3908	14.8268
	9.19404	13.6571	13.575
	7.91807	13.7012	11.8427
	7.77574	11.8841	10.6847
	10.9973	10.9249	8.08207
	10.505	7.71267	7.04865
	7.00986	6.5037	4.1985
	7.06303	5.84764	2.72802
	9.95589	13.5467	6.44198
	7.94081	10.5219	2.5438
	12.0381	12.4961	6.39154
	12.9953	16.54	3.58409
	6.13226	10.0117	5.62382
	7.1265	18.7408	5.69416
	12.0024	15.1158	2.92103
	13.8161	4.94953	3.06067
	6.24989	13.9103	3.46618
	14.3323	15.1325	3.46676
	4.83837	6.76878	6.8338
	8.30839	7.29151	4.99936
	7.86087	10.4689	5.95014
	6.62315	7.27133	5.82549
	8.99323	6.45368	6.74948
	8.12299	10.094	8.08464
	6.07075	7.23508	8.33307
	8.18001	9.5456	5.91757
	15.8891	4.66571	3.37433
	12.4485	8.74455	6.99292
	11.0977	12.121	8.81719
	16.9035	16.3887	5.35936
	12.1522	13.2951	6.95849
	12.2801	14.8692	6.84062
	12.6482	14.8333	3.8657
	10.935	9.8869	5.92758
	10.6779	11.0165	3.56043
	7.69857	11.3034	7.65718
	6.66217	17.1275	4.5038
	8.74367	16.8691	6.69062
	6.6465	13.8037	11.6067
	6.04277	16.8481	11.9799
	4.26839	16.2048	7.53118
	6.84198	13.3657	10.2191
	8.47272	13.1082	10.6006
	9.08658	12.5909	11.4172
	6.17886	17.0784	13.1704
	6.95855	7.21467	8.11102
	3.78829	12.5829	13.9642
	9.8579	12.4993	9.93658
	10.2746	17.3125	8.46557
	8.81918	10.529	12.4327
	12.3637	18.2449	6.50803
	10.7058	19.8644	1.47426
	4.85837	11.9877	5.36595
	6.03986	9.53647	13.0901
	10.3041	17.4494	9.99264
	8.37032	12.9992	9.77259
	6.87574	16.7533	9.7501
	10.3915	17.5633	11.1728
	9.04312	5.75705	10.5935
	7.06088	4.75572	9.94986
	4.79379	8.56251	7.29626
	3.92068	8.8591	7.53496
	11.8622	15.1807	6.92656
	10.0988	9.89592	5.72499
	6.12343	8.65016	5.29979
	9.03539	20.676	5.70391
	9.41836	14.9383	7.16327
	6.47225	9.79356	7.82516
	10.3274	10.7256	5.98959
	6.3513	14.4686	9.71478
	6.22076	7.7135	11.7175
	7.73642	11.7927	5.43809
	6.29034	10.7619	9.1523
	6.70544	12.1057	9.42481
			12.5257
			8.53036
			7.34297
			6.22477
			5.87225
			7.831
Average	8.46837	11.8814	7.74098

## Sheet: Fig. 6F
Figure 6. Reducing ER Ca2+ release in sel-12 mutants rescues mitochondrial disorganization and dysfunction, ectopic neurite sprouting and mechanosensory defects.
	Cellular ROS relative to Wildtype
	Wildtype	sel-12(ty11)	crt-1;sel-12(ty11)
	1.0025	1.53728	1.11327
	0.997503	1.58755	1.17945
	1.00073	1.65385	1.19382
	0.990214	1.22838	0.652223
	1.00906	1.21425	0.66426
	1.15877	1.19433	0.603877
	0.991744	1.22245
	0.84949	1.2733
		1.12074
Average	1	1.3369	0.90115

## Sheet: Fig. 6G
Figure 6. Reducing ER Ca2+ release in sel-12 mutants rescues mitochondrial disorganization and dysfunction, ectopic neurite sprouting and mechanosensory defects.
	Sprouts / ALM soma
n	Wildtype	sel-12(ty11)	crt-1;sel-12(ty11)
1	0	3	0
2	0	1	1
3	1	6	1
4	1	4	0
5	1	5	2
6	1	2	2
7	1	7	1
8	1	3	1
9	1	1	0
10	1	0	2
11	1	3	0
12	1	4	2
13	1	5	2
14	0	3	2
15	0	1	1
16	0	1	1
17	0	1	0
18	1	1	2
19	0	2	2
20	0	1	4
21	0	1	2
22	1	2	1
23	0	1	1
24	0	1	0
25	0	1	2
26	0	2	1
27	0	1	2
28	0	2	0
29	1	2	0
30	0	3	0
31	0	1	0
32	0	0	1
33	1	0	1
34	1	1	2
35	2	1	1
36	1	1	0
37	1	1	2
38	1	1	1
39	1	2	0
40	1	1	2
41	1	1	0
42	0	5	1
43	1	2	5
44	1	5	1
45	1	3	1
46	1	4	1
47	1	4	0
48	0	1	2
49	0	4	2
50	0	3	1
51	1	3	0
52	0	4	1
53	0	4	1
54	1	3	1
55		2	1
56		5	0
57		2	1
58		1	1
59		5	3
60		1	1
61		2	5
62		2	1
63		2	2
64			0
65			1
66			1
67			2
68			0
69			1
70			4
71			2
72			2
73			1
74			1
75			0
76			0
77			0
78			0
79			0
80			0
81			1
82			1
83			1
84			1
85			0
86			0
87			4
Average	0.574074	2.33333	1.14943

## Sheet: Fig. 6H
Figure 6. Reducing ER Ca2+ release in sel-12 mutants rescues mitochondrial disorganization and dysfunction, ectopic neurite sprouting and mechanosensory defects.
	% Positive response to soft touch
n	Wild type	sel-12(ty11)	crt-1	crt-1;sel-12(ty11)
1	80	60	70	80
2	100	20	100	70
3	100	60	70	100
4	100	20	100	80
5	100	30	80	70
6	70	60	70	0
7	40	40	100	80
8	60	40	100	60
9	80	20	60	60
10	10	30	70	70
11	80	30	60	60
12	30	40	80	60
13	70	60	100	60
14	80	40	70	60
15	80	70	80	80
16	80	40	70	60
17	80	10	100	80
18	100	20	100	100
19	90	40	100	70
20	100	30	80	90
21	100	20	80	100
22	90	20	70	100
23	90	10	100	70
24	60	100	100	100
25	90	40	100	70
26	80	50	100	80
27	90	40	100	100
28	50	10	100	70
29	90	10	80	70
30	100	20	70	100
31	100	20	80	60
32	90	40	80	50
33	100	40	80	80
34	80	30	60	60
35	80	40	70	60
36	70	40	100	60
37	30	20	90	80
38	60	40	90	100
39	80	100	90	60
40	60	40	100	100
41	70	80	100	100
42	70	0	70	80
43	100	20	80	80
44	80	20	80	100
45	100	20	80	100
46	60	60	60	80
47	70	40	100	100
48	100	90	60	60
49	80	100	60	70
50	80	50	70	70
51	100	20	70	80
52	100	50	60	100
53	100	50	60	60
54	50	50	60	90
55	60	100	100	80
56	60	40	100	100
57	90	40	70	30
58	70	100	100	60
59	100	40	90	100
60	100	100	90	100
61	90	40	80	60
62	100	70	90	60
63	80	50	80	100
64	70	20	70	60
65	100	40	100	50
66	100	80	80	100
67	100	40	80	100
68	100	40	100	80
69	100	70	60	60
70	100	100	100	40
71	70	100	100	100
72	100	40	70	100
73	100	100	100	70
74	100	40	40	100
75	80	60	100	100
76	90	40	100	70
77	80	60	100	100
78	100	70	70	70
79	100	60	70	80
80	100	70	70	90
81	100	60	100	100
82	60	80	100	80
83	90	40	80	80
84	80	60	60	100
85	100	50	80	100
86	100	60	80	100
87	60	60	80	100
88	80	100	70	100
89	100	50	60	100
90	70	20	100	40
91	80	40	100	50
92	90	50	60	70
93	80	80	100	100
94	100		70	80
95	100		70	80
96	80		80	100
97	50		100	100
98	100		80	40
99	100		100	50
100	100		100	10
101	100		100
102	100		100
103	80		100
104	90
105	70
106	100
107	100
108	100
109	100
110	80
111	100
112	100
113	100
114	100
115	100
116	100
117	100
118	70
119	100
120	60
Average	84.9167	48.3871	83.3981	77.7
