# Supplementary material for: Presenilin mutations deregulate mitochondrial Ca2+ homeostasis and metabolic activity causing neurodegeneration in Caenorhabditis elegans
Source: eLife journal article supplement (doi:10.7554/elife.33052), 2018-07-10
Supplement: supp [file elife-33052-supp-v1.zip › elife_poa_e33052_Figure_7_figure_supplement_1_source_data_1.xlsx]

## Sheet: Fig. S6A
Figure 7-figure supplement 1. Reduction of ER Ca2+ release improves the structure of mechanosensory neurons in sel-12 animals.
	Number of axons with waves/10 axons
n	Wild type	sel-12(ty11)	mcu-1;sel-12(ty11)
10	2	4	2
20	2	6	1
30	3	6	5
40	3	6	5
50	3	7	2
60	2	8	1
70	2	9	2
80	1	9	2
90	3	7	2
100	3	7	3
110	3	8	5
120	3		5
130	4		4
140	3		3
150	3		3
160	3		3
Average	2.6875	7	3

## Sheet: Fig. S6B
Figure 7-figure supplement 1. Reduction of ER Ca2+ release improves the structure of mechanosensory neurons in sel-12 animals.
	Number of axons with lesions/10 axons
n	Wild type	sel-12(ty11)	mcu-1;sel-12(ty11)
10	1	5	2
20	1	5	1
30	2	6	2
40	2	5	2
50	0	5	2
60	0	6	1
70	2	6	2
80	1	5	1
90	3	7	2
100	2	7	3
110	1	7	2
120	1		2
130	2		3
140	1		2
150	1		2
160	1		2
Average	1.3125	5.81818	1.9375

## Sheet: Fig. S6C
Figure 7-figure supplement 1. Reduction of ER Ca2+ release improves the structure of mechanosensory neurons in sel-12 animals.
	Number of axons with breaks/10 axons
n	Wild type	sel-12(ty11)	mcu-1;sel-12(ty11)
10	0	2	1
20	0	2	0
30	0	3	0
40	0	3	0
50	0	3	0
60	1	2	0
70	0	1	0
80	0	1	0
90	0	2	0
100	0	1	0
110	0	1	0
120	0	0	0
130		1	0
140			0
150			0
160			0
Average	0.0833333	1.69231	0.0625
