# Supplementary material for: Presenilin mutations deregulate mitochondrial Ca2+ homeostasis and metabolic activity causing neurodegeneration in Caenorhabditis elegans
Source: eLife journal article supplement (doi:10.7554/elife.33052), 2018-07-10
Supplement: supp [file elife-33052-supp-v1.zip › elife_poa_e33052_Figure_7_source_data_1.xlsx]

## Sheet: Fig. 7A
Figure 7. PSEN functions to regulate mitochondrial activity by mediating Ca2+ transfer from the ER to the mitochondria
	Mito::GCAMP/mcherry fluorescence intensity normailsed to WT
n	Wild type	sel-12(ty11)	mcu-1	mcu-1;sel-12(ty11)
1	1.28822	3.29942	0.675381	0.449981
2	1.16278	4.24245	0.385459	0.288206
3	1.27628	2.59855	0.166861	0.499805
4	1.79319	2.3502	0.286862	0.291994
5	0.923438	4.93825	0.194571	0.492757
6	0.414255	5.32754	0.221772	0.22266
7	0.826758	4.45587	0.204561	0.310144
8	1.36084	5.1331	0.510851	0.397578
9	1.15004	2.30245	0.220866	0.255619
10	0.805523	3.43056	0.293328	0.262063
11	0.806161	2.07846	0.283502	0.159516
12	0.783493	4.14204	0.250149	0.409185
13	1.06988	3.74906	0.212775	0.38294
14	0.639614	3.63208	0.548206	0.604869
15	0.955185	2.63773	0.20431	0.445205
16	0.71044	1.77506	0.387208	0.654693
17	0.762845	3.63994	0.24201	0.563246
18	0.429017	2.94683	0.251462	0.325586
19	0.918256	3.51884	0.247873	0.423673
20	1.06881	2.96112	0.483102	0.722464
21	1.1574	2.80431	0.322631	0.382782
22	0.94087	2.04052	0.465473	0.404691
23	1.12104	3.20886	0.175233	0.73834
24	0.986037	3.25502	0.216681	0.459613
25	2.16223		0.219011	0.716127
26	0.875991		0.179916	0.420135
27	0.909637		0.287094	0.581458
28	0.699749			0.817509
29	0.57794			0.414189
30	1.42407			0.348466
31	1.51188			0.30858
32	0.526842			0.258449
33	0.94762			0.65418
34	0.999562
35	1.65431
36	0.47301
37	0.516042
38	1.11632
39	0.990821
40	1.96719
41	0.378633
42	0.86544
43	0.889037
44	1.16329
45	1
Average	1	3.35284	0.301376	0.444446

## Sheet: Fig. 7B
Figure 7. PSEN functions to regulate mitochondrial activity by mediating Ca2+ transfer from the ER to the mitochondria
	% distribution of continuous vs discontinuous mitochondrial phenotype
		Wildtype	sel-12(ty11)	mcu-1;sel-12(ty11)
	Continuous	75	15	35
	Discontinuous	25	85	65
	n	48	96	60

## Sheet: Fig. 7C
Figure 7. PSEN functions to regulate mitochondrial activity by mediating Ca2+ transfer from the ER to the mitochondria
	Cellular ROS relative to Wildtype
	Wild type	sel-12(ty11)	mcu-1;sel-12(ty11)
	1.0025	1.53728	1.43857
	0.997503	1.58755	1.42255
	1.00073	1.65385	1.4751
	0.990214	1.22838	1.07763
	1.00906	1.21425	1.03706
	1.15877	1.19433	1.09221
	0.991744	1.22245	1.01577
	0.84949	1.2733	1.0638
		1.12074	0.945063
Average	1	1.3369	1.17419

## Sheet: Fig. 7D
Figure 7. PSEN functions to regulate mitochondrial activity by mediating Ca2+ transfer from the ER to the mitochondria
	Basal OCR
	Wild type	sel-12(ty11)	mcu-1;sel-12(ty11)
	10.5211	9.41662	6.76598
	4.29848	3.19238	5.29481
	3.94392	6.38533	8.9875
	5.15493	7.15136	7.24773
	4.01566	6.66173	7.68886
	8.36851	7.5313	11.3137
	4.06729	5.02402	7.38599
	4.16505	6.69855	3.73533
	4.0898	6.54257	4.63965
	9.46561	6.28957	4.38516
	3.10673	5.66353	4.92831
	6.14543	7.29722	6.54064
	5.8267	5.83067	5.64173
	4.62712	5.06641	4.66694
	3.526	4.47447	6.63812
	4.79142	7.59004	6.36047
	7.35973	7.84091	5.95978
	6.20788	6.04262	3.8601
	4.87317	6.80449	5.67522
	5.29345	6.44696	6.19137
	3.68714	3.66835	6.12263
	5.21169	7.16797	6.06646
	5.40616	3.9367	4.32563
	2.63676	5.12053	2.39197
	6.73189	7.53329	4.15344
	3.23282	5.55353	5.31707
	3.63823	4.32553	4.21018
	4.64586	6.00438	4.11288
	5.64391	5.74859	7.06086
	4.42774	4.78115	6.09532
	7.34193	6.22392	7.0583
	6.31247	7.46224	7.67918
	7.09661	4.90488	10.7637
	6.54617	8.121	7.35982
	4.23991	6.22501	6.3287
	5.96679	6.53135	7.85573
	4.81542	6.0525	9.09724
	6.93375	4.16091	6.89303
	4.05515	5.42206	8.23179
	5.79042	9.97019	8.80462
	5.84983	5.84564	9.72968
	3.55169	6.72701	4.43719
	3.63374	7.65212	7.83352
	4.89698	4.23549	7.74747
	3.90096	3.24995	6.68587
	4.39678	5.81984	8.91793
	6.32104	7.38689	6.55134
	3.11737	4.41057	7.42575
	2.97244	4.90705	7.38943
	4.96243	4.66672	5.87846
	4.58695	6.32648	6.25558
	6.09214	8.80981	6.10315
	4.52174	9.35797	6.39458
	4.19661	5.97324	5.01109
	6.32134	9.54612	7.23136
	5.10892	8.02063	5.52282
	3.41953	4.62752	4.98175
	3.94654	8.58957	8.16806
	3.44959	10.2903	7.17276
	1.94423	6.56102	5.14741
	5.83592	6.41057	7.65705
	5.95089	9.58015	5.49904
	3.64296	6.63088	6.78072
	3.07137	7.93572	5.23015
	5.57059	8.90129	5.24954
	5.42393	4.03095	8.45558
	6.39625	7.52975	3.11854
	4.97994	5.37549	4.9419
	4.64935	5.27911	6.7012
	5.37153	5.49224	6.3081
	3.24784	6.87475	5.64194
	4.49978	7.81334	5.23435
	3.19938	5.37199	4.42578
	4.47258	6.47418	4.36525
	4.90224	6.24275	3.55928
	5.19888	5.34741	4.83015
	3.40711	6.16667	4.18474
	5.39886	6.59463	4.90562
	5.83353	4.83627	4.57543
	3.63123	4.73169	4.24781
	2.94089	5.78773	3.43024
			3.60655
			4.65099
			3.92135
			6.35104
			2.30815
			2.79583
			2.84619
			3.39846
			4.18775
Average	4.92623	6.33675	5.90922

## Sheet: Fig. 7E
Figure 7. PSEN functions to regulate mitochondrial activity by mediating Ca2+ transfer from the ER to the mitochondria
	Maximal OCR
	Wild type	sel-12(ty11)	mcu-1;sel-12(ty11)
	4.89428	12.0232	3.77724
	8.48008	10.3219	6.35913
	5.82681	7.25221	7.58309
	6.21979	17.9809	8.59213
	5.52848	8.49764	7.62847
	7.10102	8.80245	9.29902
	7.01123	8.0435	11.7169
	7.5282	10.7834	8.54733
	7.78911	9.37297	10.75
	5.75421	12.9481	10.3095
	6.41661	12.3908	11.6573
	9.19404	13.6571	9.84287
	7.91807	13.7012	4.1073
	7.77574	11.8841	10.921
	10.9973	10.9249	11.716
	10.505	7.71267	9.81557
	7.00986	6.5037	6.94064
	7.06303	5.84764	7.74631
	9.95589	13.5467	9.04518
	7.94081	10.5219	12.1423
	12.0381	12.4961	9.33383
	12.9953	16.54	12.1811
	6.13226	10.0117	13.0412
	7.1265	18.7408	11.4644
	12.0024	15.1158	13.1668
	13.8161	4.94953	4.57508
	6.24989	13.9103	5.36171
	14.3323	15.1325	10.6777
	4.83837	6.76878	5.86584
	8.30839	7.29151	11.3427
	7.86087	10.4689	12.2756
	6.62315	7.27133	10.3693
	8.99323	6.45368	10.0054
	8.12299	10.094	6.68049
	6.07075	7.23508	12.3931
	8.18001	9.5456	14.0634
	15.8891	4.66571	13.5542
	12.4485	8.74455	9.76666
	11.0977	12.121	10.1228
	16.9035	16.3887	15.8248
	12.1522	13.2951	10.6333
	12.2801	14.8692	20.5447
	12.6482	14.8333	7.49359
	10.935	9.8869	11.4862
	10.6779	11.0165	21.2751
	7.69857	11.3034	7.88863
	6.66217	17.1275	10.386
	8.74367	16.8691	9.4745
	6.6465	13.8037	16.2528
	6.04277	16.8481	11.7017
	4.26839	16.2048	25.6529
	6.84198	13.3657	13.1104
	8.47272	13.1082	15.0851
	9.08658	12.5909	11.5095
	6.17886	17.0784	14.5538
	6.95855	7.21467	9.92242
	3.78829	12.5829	12.6779
	9.8579	12.4993	12.3836
	10.2746	17.3125	13.788
	8.81918	10.529	6.24502
	12.3637	18.2449	7.06572
	10.7058	19.8644	6.48021
	4.85837	11.9877	8.3439
	6.03986	9.53647	7.94743
	10.3041	17.4494	7.99871
	8.37032	12.9992	10.273
	6.87574	16.7533	6.10489
	10.3915	17.5633	8.09567
	9.04312	5.75705	11.9026
	7.06088	4.75572	6.61709
	4.79379	8.56251	7.66661
	3.92068	8.8591	14.0229
	11.8622	15.1807	5.93738
	10.0988	9.89592	8.17303
	6.12343	8.65016	10.4522
	9.03539	20.676	7.34811
	9.41836	14.9383	8.12124
	6.47225	9.79356	6.6796
	10.3274	10.7256	5.77237
	6.3513	14.4686	6.65543
	6.22076	7.7135	11.2976
	7.73642	11.7927	5.89363
	6.29034	10.7619	15.011
	6.70544	12.1057	8.79383
			8.25776
			6.324
			7.61133
			6.73241
			8.74181
			9.26324
Average	8.46837	11.8814	10.0246

## Sheet: Fig. 7F
Figure 7. PSEN functions to regulate mitochondrial activity by mediating Ca2+ transfer from the ER to the mitochondria
	Sprouts / ALM soma
n	Wild type	sel-12(ty11)	mcu-1	mcu-1;sel-12(ty11)
1	0	3	1	4
2	0	1	1	0
3	1	6	0	0
4	1	4	0	0
5	1	5	0	3
6	1	2	0	0
7	1	7	1	0
8	1	3	0	0
9	1	1	0	3
10	1	0	0	2
11	1	3	0	3
12	1	4	2	4
13	1	5	0	0
14	0	3	0	4
15	0	1	0	0
16	0	1	0	4
17	0	1	1	0
18	1	1	0	0
19	0	2	2	6
20	0	1	1	0
21	0	1	0	4
22	1	2	1	0
23	0	1	1	3
24	0	1	1	0
25	0	1		3
26	0	2		0
27	0	1		1
28	0	2		0
29	1	2		4
30	0	3		4
31	0	1		4
32	0	0		1
33	1	0		0
34	1	1		0
35	2	1		0
36	1	1		0
37	1	1		0
38	1	1		1
39	1	2		0
40	1	1		0
41	1	0		0
42	0	1		1
43	1	5		0
44	1	2		1
45	1	5		0
46	1	3		1
47	1	4		0
48	0	4		1
49	0	1		0
50	0	4		1
51	1	3		0
52	0	3		1
53	0	4		1
54		4		1
55		3		1
56		2		1
57		5		1
58		2		0
59		1		2
60		5		0
61		2
62		2
63		2
64
Average	0.566038	2.31746	0.5	1.18333

## Sheet: Fig. 7G
Figure 7. PSEN functions to regulate mitochondrial activity by mediating Ca2+ transfer from the ER to the mitochondria
	% Positive response to soft touch
n	Wild type	sel-12(ty11)	mcu-1	mcu-1;sel-12(ty11)
1	80	60	70	90
2	100	20	100	30
3	100	60	100	70
4	100	20	100	100
5	100	30	70	60
6	70	60	80	60
7	40	40	80	80
8	60	40	80	20
9	80	20	100	60
10	10	30	100	70
11	80	30	90	60
12	30	40	30	100
13	70	60	90	70
14	80	40	60	80
15	80	70	100	90
16	80	40	100	80
17	80	10	60	100
18	100	20	100	40
19	90	40	100	100
20	100	30	80	70
21	100	20	100	20
22	90	20	30	70
23	90	10	100	100
24	60	100	50	60
25	90	40	90	40
26	80	50	100	100
27	90	40	100	100
28	50	10	60	100
29	90	10	40	100
30	100	20	100	100
31	100	20	80	80
32	90	40	100	80
33	100	40	80	90
34	80	30	100	100
35	80	40	100	100
36	70	40	100	60
37	30	20	60	80
38	60	40	100	70
39	80	100	70	60
40	60	40	80	100
41	70	80	100	80
42	70	0	100	100
43	100	20	70	100
44	80	20	100	80
45	100	20	70	100
46	60	60	20	100
47	70	40	80	60
48	100	90	80	100
49	80	100	60	60
50	80	50	0	100
51	100	20	100	90
52	100	50	100	30
53	100	50	50	70
54	50	50	100	100
55	60	100	100	80
56	60	40	80	90
57	90	40	100	90
58	70	100	80	30
59	100	40	80	100
60	100	100	80	100
61	90	40	70	40
62	100	70	100	60
63	80	50	100	60
64	70	20	90	60
65	100	40	100	100
66	100	80	100	70
67	100	40	100	100
68	100	40	100	100
69	100	70	100	100
70	100	100	80	100
71	70	100	100	60
72	100	40	70	70
73	100	100	100	100
74	100	40	100	80
75	80	60	100	100
76	90	40	100	80
77	80	60	70	80
78	100	70	80	40
79	100	60	50	80
80	100	70	60	80
81	100	60	40	70
82	60	80	50	100
83	90	40	90	60
84	80	60	80	70
85	100	50	60	60
86	100	60	70	100
87	60	60	80	100
88	80	100	80	100
89	100	50	70	60
90	70	20	90	80
91	80	40	90	70
92	90	50	40	100
93	80	80	100	100
94	100		60	70
95	100		60	100
96	80		60	70
97	50		80	100
98	100		90	70
99	100		80	70
100	100		80	100
101	100		100	80
102	100		100	100
103	80		100	40
104	90		100	50
105	70		60	100
106	100		80	100
107	100		100	60
108	100		60	60
109	100		100	70
110	80		100	80
111	100		100	100
112	100		90	100
113	100		100	100
114	100		100	80
115	100		100	100
116	100		100	100
117	100		100	100
118	70		40	70
119	100		80	60
120	60		100	60
121				100
122				40
123				70
124				80
125				60
126				100
127				80
128				30
Average	84.9167	48.3871	82.5833	78.75

## Sheet: Fig. 7H
Figure 7. PSEN functions to regulate mitochondrial activity by mediating Ca2+ transfer from the ER to the mitochondria
	ATP levels normalized to Control
	Control	FAD	FAD Ru360
	1.17596	1.84101	1.22123
	1.03826	2.02749	1.25384
	0.785772	1.94961
Average	1	1.93937	1.23754

## Sheet: Fig. 7I
Figure 7. PSEN functions to regulate mitochondrial activity by mediating Ca2+ transfer from the ER to the mitochondria
	ROS levels normalized to Control
	Control	FAD	FAD RU360
	1.06447	1.98489	1.35986
	0.882397	1.84613	1.45052
	1.03903	1.83757	1.04256
	0.99446	1.73835	1.38252
	1.06976	1.88819	1.33216
	0.949887	1.82775	1.33392
Average	1	1.85381	1.31692
