# Supplementary material for: Presenilin mutations deregulate mitochondrial Ca2+ homeostasis and metabolic activity causing neurodegeneration in Caenorhabditis elegans
Source: eLife journal article supplement (doi:10.7554/elife.33052), 2018-07-10
Supplement: supp [file elife-33052-supp-v1.zip › elife_poa_e33052_Figure_8_figure_supplement_1_source_data_1.xlsx]

## Sheet: Fig. S7A
Figure 8-figure supplement 1. Reduction of mitochondrial fission does not alleviate the neurodegeneration in sel-12(ty11) animals.
	% ALM neurons with fragmented mitchondria
n	sel-12(ty11) + EV RNAi	sel-12(ty11) + drp-1RNAi
10	7	5
20	6	4
30	7	3
40	7	4
50		5
Average	6.75	4

## Sheet: Fig. S7B
Figure 8-figure supplement 1. Reduction of mitochondrial fission does not alleviate the neurodegeneration in sel-12(ty11) animals.
	Mito::GCAMP/mcherry fluorescence intensity normailsed to WT
n	sel-12(ty11) + EV RNAi	sel-12(ty11) + drp-1RNAi
1	2.00785	1.80452
2	1.48021	2.06286
3	0.99405	0.846623
4	1.45568	1.36449
5	3.02698	1.88501
6	4.21362	5.06293
7	5.39728	1.21679
8	5.96183	2.21046
9	3.69479	3.82238
10	4.35113	1.31986
11	1.714	0.732276
12	4.03695	3.92366
13	0.74645	3.38569
14	1.0433	6.32943
15	0.765753	1.18897
16		1.33885
17		4.3011
18		3.57249
19		2.2768
Average	2.72599	2.56027

## Sheet: Fig. S7C
Figure 8-figure supplement 1. Reduction of mitochondrial fission does not alleviate the neurodegeneration in sel-12(ty11) animals.
	Basal OCR
n	sel-12(ty11) + EV RNAi	sel-12(ty11) + drp-1RNAi
1	25.0778	17.0378
2	14.225	15.3363
3	20.4101	13.8613
4	26.3624	19.3239
5	14.9168	19.1684
6	13.3842	15.8831
7	26.6376	19.7802
8	20.5668	14.3516
9	18.8438	20.8209
10	18.6497	15.4772
11	16.6954	21.4044
12	15.358	24.2852
13	19.4424	15.7575
14	25.091	17.9665
15	23.6003	14.2638
16	20.6462	9.08121
17	21.2732	23.4168
18	19.6542	17.9965
19	13.2538	9.3192
20	21.7154	16.48
21	14.9206	18.2768
22	14.299	17.557
23	19.4592	16.5614
24	19.8386	10.8981
25	14.4194	21.2484
26	22.4676	12.8866
27	18.2479	8.77505
28	7.72766	25.7033
29	20.6777	18.3701
30	18.1823	18.1996
31	17.2977	15.9038
32	15.1514	15.3028
33	21.4058	18.0414
34	18.1143	15.9628
35	15.253	11.7468
36	15.1773	8.10861
37	15.4318	6.5824
38	10.3147	10.445
39	5.62661	18.877
40	7.39804	14.2305
41	8.8576	18.186
42	19.3577	2.90261
43	17.1141	10.7533
44	11.6545	13.7292
45	15.4845	3.25724
46	11.6468	6.25465
47	18.7626	24.6864
48	10.5373	26.8408
49	22.5829	17.351
50	18.5295	16.551
51	7.12006	14.06
52	11.18	10.2085
53	8.27527	17.3464
54	23.9585	28.3772
55	26.0236	15.8784
56	5.27941	12.2189
57	18.2332	15.0716
58	18.9097	13.5202
59	25.8308	15.0188
60	12.4981	12.7021
Average	16.9842	15.6601

## Sheet: Fig. S7D
Figure 8-figure supplement 1. Reduction of mitochondrial fission does not alleviate the neurodegeneration in sel-12(ty11) animals.
	Maximal OCR
n	sel-12(ty11) + EV RNAi	sel-12(ty11) + drp-1RNAi
1	21.2659	28.7627
2	20.5852	13.2633
3	25.9162	33.6107
4	18.8815	21.5315
5	27.5106	25.168
6	20.5272	32.4089
7	25.2223	21.478
8	30.3317	31.3252
9	27.7853	26.0495
10	26.4953	23.7125
11	21.5098	30.1976
12	22.614	25.4122
13	21.0823	21.936
14	17.6384	31.065
15	24.1014	25.4115
16	11.6468	6.25465
17	18.7626	24.6864
18	10.5373	26.8408
19	22.5829	17.351
20	18.5295	16.551
21	7.12006	14.06
22	11.18	10.2085
23	8.27527	17.3464
24	23.9585	28.3772
25	26.0236	15.8784
26	5.27941	12.2189
27	18.2332	15.0716
28	18.9097	13.5202
29	25.8308	15.0188
30	12.4981	12.7021
31	11.9281	11.0369
32	23.3483	10.1626
33	22.4219	18.2313
34	23.2069	14.3202
35	20.0334	13.0329
36	18.6383	18.8092
37	22.6768	8.03682
38	23.6052	21.0483
39	19.4348	28.1596
40	21.655	20.3573
41	22.7303	5.62807
42	15.8265	16.5983
43	12.4579	18.3663
44	28.5435	14.7675
45	22.2212	18.6563
Average	19.9903	19.4362

## Sheet: Fig. S7E
Figure 8-figure supplement 1. Reduction of mitochondrial fission does not alleviate the neurodegeneration in sel-12(ty11) animals.
	Sprouts / ALM soma
n	sel-12(ty11) + EV RNAi	sel-12(ty11) + drp-1RNAi
1	3	1
2	1	2
3	0	3
4	2	1
5	3	1
6	3	5
7	1	1
8	3	5
9	1	1
10	1	3
11	3	2
12	1	1
13	2	0
14	5	5
15	2	0
16	4	2
17	3	2
18	3	2
19	3	1
20	2	4
21	3	6
22	4	2
23	4	7
24	1	2
25	2	1
26	2	2
27	7	1
28	3	0
29	4	4
30	2	0
31		1
32		1
33		4
34		1
35		1
36		4
Average	2.6	2.23333

## Sheet: Fig. S7F
Figure 8-figure supplement 1. Reduction of mitochondrial fission does not alleviate the neurodegeneration in sel-12(ty11) animals.
	% Positive response to soft touch
n	sel-12(ty11) + EV RNAi	sel-12(ty11) + drp-1RNAi
1	20	60
2	20	20
3	60	40
4	20	50
5	40	0
6	0	0
7	80	20
8	30	40
9	20	0
10	0	40
11	80	20
12	50	20
13	90	20
14	20	50
15	20	100
16	10	30
17	20	100
18	30	10
19	10	10
20	80	80
21	20	90
22	50	30
23	30	40
24	100	70
25	100	30
26	0	30
Average	38.4615	38.4615
