# Supplementary material for: Presenilin mutations deregulate mitochondrial Ca2+ homeostasis and metabolic activity causing neurodegeneration in Caenorhabditis elegans
Source: eLife journal article supplement (doi:10.7554/elife.33052), 2018-07-10
Supplement: supp [file elife-33052-supp-v1.zip › elife_poa_e33052_Figure_8_source_data_1.xlsx]

## Sheet: Fig. 8A
Figure 8. Reducing mitochondrial activity using doxycyline alleviates neurodegenerative phenotypes observed in sel-12 mutants.
	Basal OCR normalized to control
n	Wild type	sel-12(ty11)	sel-12(ty11)+dox
1	5.28995	8.9132	6.33316
2	4.84403	8.47078	6.76264
3	4.74515	8.49425	4.08427
4	5.21392	8.41259	3.95916
5	10.7325	4.05987	3.43427
6	4.48582	12.411	8.10164
7	7.21748	4.07626	6.27595
8	3.36612	6.46632	6.8974
9	6.02613	5.49223	8.17362
10	4.48959	6.78702	6.54691
11	8.8202	6.36954	6.39713
12	5.15898	7.41567	4.45218
13	5.83302	7.07644	7.12905
14	6.37046	7.55105	4.64159
15	4.83284	7.38268	6.56903
16	11.7067	15.892	4.40972
17	13.1352	9.90996	3.3772
18	8.35816	10.9555	5.49818
19	9.44915	12.4543	3.44764
20	10.3687	11.3022	5.63572
21	14.412	15.3737	2.98676
22	14.3701	15.2099	4.97407
23	13.6043	11.8828	3.56304
24	15.8069	12.9802	6.60459
25	8.90378	10.7688	5.19716
26	9.41531	5.02572	5.72848
27	9.37054	14.5464	2.32897
28	10.8675	8.22564	3.43214
29	8.04881	12.5151	6.93927
30	16.7523	17.1978	5.95994
31	9.80206	11.5728	6.94179
32	9.6852	12.9867	7.80628
33	9.12749	12.5528	7.24982
34	7.42663	10.5244	8.59833
35	14.7146	12.6202	8.65601
36	9.52249	22.7502	5.34054
37	4.86847	21.6062	4.90497
38	4.1787	10.0089	4.68529
39	7.99508	13.5864	8.05111
40	6.47775	15.1487	5.886
41	9.45003	12.1521	11.3077
42	5.43734	6.81373	10.1976
43	3.65797	8.16814	7.7182
44	4.55112	7.96173	10.4201
45	10.1145	10.9895	11.6628
46			7.04952
47			7.2733
48			7.20465
49			4.20714
50			3.23587
51			6.77678
52			6.92169
53			2.9398
54			5.48241
55			4.30783
56			5.27687
57			5.30105
58			4.38851
59			6.93059
60			5.58188
61			17.3288
62			13.7054
63			7.25752
64			9.11343
65			9.01694
66			10.8738
67			8.52992
68			16.454
69			14.472
70			15.3166
71			9.27044
72			6.68102
73			14.5412
74			11.8826
75			8.74889
76			12.6575
77			11.7774
78			8.22316
79			10.9167
80			8.60016
81			6.39522
82			7.11591
83			9.27195
84			7.64754
85			9.05444
86			6.00265
87			8.17017
88			7.14478
89			8.54765
90			10.82
Average	8.42234	10.7347	7.4187

## Sheet: Fig. 8B
Figure 8. Reducing mitochondrial activity using doxycyline alleviates neurodegenerative phenotypes observed in sel-12 mutants.
	Maximal OCR normalized to control
n	Wild type	sel-12(ty11)	sel-12(ty11)+dox
1	10.7065	9.63455	6.38523
2	7.83628	8.0385	4.25485
3	12.2965	16.7223	4.55449
4	8.43207	12.9176	8.96983
5	10.9853	11.9253	7.6942
6	6.64433	12.8096	6.03193
7	6.93391	11.7894	5.11069
8	10.6469	14.31	5.81408
9	5.65376	17.4445	9.40588
10	6.32735	10.1335	5.11809
11	7.31684	9.73982	3.58155
12	3.91176	18.8204	8.641
13	9.28187	16.8094	3.41362
14	5.59133	10.8668	6.9423
15	7.25922	10.5162	6.48752
16	7.04003	18.5997	9.43216
17	13.0646	16.842	9.68954
18	10.752	15.6944	12.8606
19	9.02928	19.0134	6.48183
20	15.0091	15.9159	6.1535
21	14.3935	18.8112	10.0293
22	13.4593	11.2244	9.82816
23	15.0487	20.0911	9.76601
24	9.39902	14.7042	12.1285
25	5.91498	18.7661	7.89443
26	18.1398	11.6708	12.801
27	13.5862	20.3306	18.6397
28	12.2776	13.6787	11.2185
29	10.4656	7.68658	10.859
30	13.8581	22.5037	12.2447
31	12.1898	9.39614	5.32088
32	6.88882	12.532	9.54603
33	7.97638	19.5321	4.80277
34	9.65753	17.767	8.83368
35	7.13826	21.104	10.1626
36	6.63014	18.4965	12.8671
37	8.3453	19.1857	8.93067
38	7.39368	21.6406	7.19383
39	3.73359	6.32993	6.9442
40	7.62605	19.9964	10.3712
41	2.58807	9.55974	9.79306
42	6.11235	9.01391	10.1367
43	7.27825	14.4538	10.3295
44	3.84129	18.6423	8.78987
45	4.82566	12.1152	7.64052
46			8.36931
47			11.9344
48			16.8218
49			13.8595
50			11.2896
51			5.62099
52			9.22066
53			7.51457
54			5.52002
55			8.98078
56			8.81485
57			8.02612
58			10.5219
59			12.6183
60			3.16649
61			10.9428
62			17.0453
63			14.0857
64			15.0127
65			14.9905
66			21.484
67			15.5874
68			14.6484
69			9.83202
70			10.4454
71			15.2361
72			11.5837
73			14.0971
74			14.87
75			7.46294
76			8.9057
77			10.6793
78			12.7372
79			11.7827
80			13.0571
81			10.8212
82			7.25726
83			8.46069
84			7.29635
85			8.15204
86			3.17118
87			6.67878
88			7.08807
89			6.89059
90			6.21636
Average	8.96637	14.8395	9.5877

## Sheet: Fig. 8C
Figure 8. Reducing mitochondrial activity using doxycyline alleviates neurodegenerative phenotypes observed in sel-12 mutants.
	% Positive response to soft touch
n	Wild type	sel-12(ty11)	sel-12(ty11)+dox
1	100	40	70
2	60	60	100
3	80	30	20
4	70	30	60
5	100	40	50
6	60	40	100
7	50	10	100
8	60	40	60
9	80	100	100
10	70	40	90
11	100	40	80
12	60	40	100
13	80	50	70
14	70	30	50
15	100	10	100
16	100	100	40
17	100	40	50
18	60	80	100
19	80	40	100
20	100	40	40
21	60	100	20
22	70	30	100
23	0	100	90
24	10	50	60
25	30	30	70
26		60	100
27		30	100
28		20	100
29		40	80
30		60	100
31		0	60
32			10
33			30
34			80
35			90
36			20
37			100
38			80
39			70
40			70
41			60
42			100
43			30
44			90
45			50
46			70
47			20
48			10
49			80
50			100
51			50
52			50
Average	70	45.8065	69.6154

## Sheet: Fig. 8D
Figure 8. Reducing mitochondrial activity using doxycyline alleviates neurodegenerative phenotypes observed in sel-12 mutants.
	Sprouts / ALM soma
n	Wild type	sel-12(ty11)	sel-12(ty11)+dox
1	0	3	1
2	0	1	0
3	1	3	1
4	1	3	0
5	0	0	0
6	1	0	0
7	1	4	0
8	1	0	0
9	2	1	1
10	0	5	0
11	0	1	0
12	1	2	0
13	1	1	0
14	1	2	0
15	0	1	0
16	1	3	0
17	1	2	6
18	1	2	1
19	1	2	0
20	0	4	0
21	1	1	1
22	0	1	0
23	1	1	0
24	0	3	0
25	1	1	0
26	0	0	0
27	1	3	0
28	1	1	0
29	0	2	0
30	1	3	0
31	1		1
32	0		0
33	3		0
34	0		5
35	0		0
36	0		0
37	0		2
38	1		1
39	1		3
40	0		1
41	0		2
42	1		0
Average	0.642857	1.86667	0.589744

## Sheet: Fig. 8E
Figure 8. Reducing mitochondrial activity using doxycyline alleviates neurodegenerative phenotypes observed in sel-12 mutants.
	Number of axons with breaks/10 axons
n	Wild type	sel-12(ty11)	sel-12(ty11)+dox
10	0	0	0
20	0	0	0
30	0	0	0
40	0	3	0
50	0	5	0
60	0	1	0
70	0		0
80	0		0
Average	0	1.5	0

## Sheet: Fig. 8F
Figure 8. Reducing mitochondrial activity using doxycyline alleviates neurodegenerative phenotypes observed in sel-12 mutants.
	ROS levels normalized to control
	Control	FAD	FAD + DOX
	0.940627	1.77299	1.23844
	0.931127	1.95574	1.27056
	0.996419	1.70558	1.31051
	1.13183	1.42527	1.46311
Average	1	1.71489	1.32065

## Sheet: Fig. 8G
Figure 8. Reducing mitochondrial activity using doxycyline alleviates neurodegenerative phenotypes observed in sel-12 mutants.
	ATP levels normalized to control
	Control	FAD	FAD + DOX
	0.888	1.9696	0.1968
	1.072	1.8128	0.1952
	1.04	2.1328	0.1776
Average	1	1.97173	0.189867

## Sheet: Fig. 8H
Figure 8. Reducing mitochondrial activity using doxycyline alleviates neurodegenerative phenotypes observed in sel-12 mutants.
	Basal OCR normalized to control
	FAD	FAD + DOX
	0.955694	0.855559
	1.01419	0.717401
	1.03012	0.677604
		0.771438
		0.705945
		0.78661
Average	1	0.750188

## Sheet: Fig. 8I
Figure 8. Reducing mitochondrial activity using doxycyline alleviates neurodegenerative phenotypes observed in sel-12 mutants.
	Maximal OCR normalized to control
	FAD	FAD + DOX
	1.05566	0.819058
	1.01276	0.685621
	0.931574	0.654024
Average	1	0.719568
