# Supplementary material for: Presenilin mutations deregulate mitochondrial Ca2+ homeostasis and metabolic activity causing neurodegeneration in Caenorhabditis elegans
Source: eLife journal article supplement (doi:10.7554/elife.33052), 2018-07-10
Supplement: supp [file elife-33052-supp-v1.zip › elife_poa_e33052_Figure_9_figure_supplement_1_source_data_1.xlsx]

## Sheet: Fig. S8A
Figure 9-figure supplement 1. Mitochondrial disorganization in the mechanosensory neurons of sel-12 animals is not a direct result of elevated ROS levels.
	Mitochondrial ROS normalized to WT
n	sel-12(ty11)	sel-12(ty11)+TPP	sel-12(ty11)+MitoTEMPO
1	1.00248	0.937627	0.88094
2	1.05866	1.02314	0.89882
3	0.879509	1.01299	0.89668
4	0.981091	1.03777	0.758448
5	1.07686	0.99878	0.895593
6	0.946015	0.995523	0.764193
7	1.04043	0.87561	0.91179
8	0.973068	0.988169	0.809814
9	1.04353	1.14822	0.865126
10	1.03441	1.07742	0.807356
11	1.2611	0.957288	0.806198
12	1.07527	0.939361	0.910994
13	1.02153	1.20145	0.837442
14	0.848368	1.0392
15	0.922906	0.994298
16	0.97676
17	0.858017
Average	1	1.01512	0.849492

## Sheet: Fig. S8B
Figure 9-figure supplement 1. Mitochondrial disorganization in the mechanosensory neurons of sel-12 animals is not a direct result of elevated ROS levels.
	Mito::GCAMP/mcherry fluorescence intensity normailsed to WT
n	Wild type	sel-12(ty11)	sel-12(ty11)+TPP	sel-12(ty11)+MitoTEMPO
1	0.942021	2.00846	2.54079	2.90775
2	1.75424	1.45381	1.38023	0.90026
3	0.479807	1.72412	0.927066	1.0705
4	0.772923	1.14005	1.7499	1.58211
5	0.91457	0.976016	1.31757	1.98329
6	0.581017	0.770609	3.62364	0.952486
7	0.926672	7.33509	2.28261	1.74517
8	0.739295	1.30684	2.32294	0.799374
9	1.87768	0.761958	0.8609	1.34903
10	0.975711	2.58927	3.67577	1.75629
11	0.66772	1.52528	1.02114	3.32853
12	0.835324	1.72966	1.31394	4.00089
13	0.582862	0.759035	2.05807	2.89544
14	1.76934	4.08157	1.36066	2.52987
15	1.01559	1.16007	0.828744	0.79372
16	2.00938	1.89719	2.04218	3.81078
17	1.29772	1.11166	0.815568	0.80932
18	1.10292	3.05837	4.15082	2.65569
19	0.644882	1.21815	1.38592	0.967962
20	0.588756	2.75561	0.822809	0.992761
21	0.69415	1.44029	2.20373
22	0.547986	3.55684	1.0229
23	1.17427	3.33271	1.4112
24	0.454589	3.473	1.84831
25	0.720435	2.8253
26	1.06398	4.09977
27	1.86616
Average	1	2.23426	1.79031	1.89156

## Sheet: Fig. S8C
Figure 9-figure supplement 1. Mitochondrial disorganization in the mechanosensory neurons of sel-12 animals is not a direct result of elevated ROS levels.
		% distribution of continuous vs discontinuous mitochondrial phenotype
		+ Vehicle		+ Mitotempo
		Wild type	sel-12(ty11)	sel-12(ty11)
	Continuous	75	15	10
	Discontinuous	25	85	90
	n	48	96	60
