# Supplementary material for: Presenilin mutations deregulate mitochondrial Ca2+ homeostasis and metabolic activity causing neurodegeneration in Caenorhabditis elegans
Source: eLife journal article supplement (doi:10.7554/elife.33052), 2018-07-10
Supplement: supp [file elife-33052-supp-v1.zip › elife_poa_e33052_Figure_9_source_data_1.xlsx]

## Sheet: Fig. 9A
Figure 9. MitoTEMPO supplementation improves neuronal structure and function of sel-12 mutants.
	Mitochondrial ROS normalized to WT
n	Wild type	sel-12(ty11)
1	0	1.49703
2	0.017097	1.23912
3	1.96579	2.49011
4	0.888734	1.45207
5	1.3968	2.07244
6	1.59572	1.70899
7	1.25978	2.39634
8	1.87609	1.19525
9	0	2.5061
10		1.64739
11		3.84173
Average	1	2.00423

## Sheet: Fig. 9B
Figure 9. MitoTEMPO supplementation improves neuronal structure and function of sel-12 mutants.
	Sprouts / ALM soma
	Wild type	sel-12(ty11)	Wild type	sel-12(ty11)
n	Vehicle treated		Mitotempo treated
1	1	3	0	1
2	0	4	0	0
3	0	0	0	1
4	2	1	1	0
5	0	0	3	1
6	0	2	0	0
7	0	3	1	6
8	0	3	0	2
9	1	4	0	1
10	0	1	1	3
11	0	1	0	1
12	0	3	1	0
13	0	4	0	2
14	0	1	1	7
15	0	2	0	0
16	1	1	0	1
17	1	2		0
18	0	4	0	2
19	1	3	1	2
20	0	1	0	0
21	0	1	0	1
22	0	2	1	2
23	1	5	1	1
24	1	7	1	4
25	0	5	0	0
26	0	4	1	0
27	0	3		0
28	0	2		0
29	1	5		0
30	0	4		2
31		0		3
32		2		0
33		3		1
34		2		1
35		2		0
36		1		0
37		7		0
38		0		0
39		5		0
40		1		0
41		1		0
42		3		2
43		2		1
44		2		1
45		4		0
46		2		0
47		1		1
48		8		4
49		3		1
50		3		1
51		2		0
52		1		1
53		0		0
54		0		1
55		1		4
56		1		0
57		3		1
58		3		0
59		2		1
60		1		1
61		1		0
62		0		0
63		4		0
64		3		0
65		2		1
66		1		1
67		2		0
68		1		1
69		2		2
70		3		0
71		0		1
72		4		1
73		4		1
74				0
75				2
76				0
77				0
78				0
79				0
80				1
81				0
82				1
83				1
84				0
85				0
86				0
87				1
Average	0.333333	2.38356	0.52	0.908046

## Sheet: Fig. 9C
Figure 9. MitoTEMPO supplementation improves neuronal structure and function of sel-12 mutants.
	% Positive response to soft touch
	Wild type	sel-12(ty11)	Wild type	sel-12(ty11)
n	Vehicle treated		Mitotempo treated
1	60	50	100	100
2	80	0	80	60
3	90	40	100	70
4	70	50	100	70
5	70	40	100	70
6	100	60	100	90
7	80	0	100	60
8	100	0	100	90
9	70	0	70	80
10	100	100	80	100
11	100	50	80	100
12	70	30	90	100
13	30	60	80	30
14	80	100	60	70
15	80	20	80	80
16	60	40	100	100
17	100	60	50	100
18	100	100	60	80
19	100	40	50	100
20	70	70	60	60
21	70	100	50	100
22	100	60	100	100
23	100	50	30	100
24	100	50	100	100
25	80	20	80	60
26	60	60	80	100
27	60	0	100	80
28	100	40	80	100
29	100	40	100	60
30	80	30	80	60
31	100	40	70	100
32		60	100	100
33		40	60	100
34		60	100	20
35		20	70	90
36		30	100	100
37		50	80	90
38		100	80	80
39		30	80	100
40		50	50	70
41		90	70	100
42		10	10	100
43		10	60	100
44		80	10	100
45		60	60	70
46		30	90	80
47		40	80	100
48		100	70	20
Average	82.5806	47.0833	76.6667	83.125
